RESEARCH ARTICLE

# Transcriptional Analyses of Natural Leaf Senescence in Maize

Wei Yang Zhang<sup>1</sup>, Yong Chao Xu<sup>2</sup>, Wen Lan Li<sup>1</sup>, Long Yang<sup>2</sup>, Xun Yue<sup>3</sup>, Xian Sheng Zhang<sup>1</sup>, Xiang Yu Zhao<sup>1\*</sup>

1. State Key Laboratory of Crop Biology, Shandong Key Laboratory of Crop Biology, College of Life Sciences, Shandong Agricultural University, Tai'an, Shandong, China, 2. College of Plant Protection, Shandong Agricultural University, Tai'an, Shandong, China, 3. College of Information Sciences and Engineering, Shandong Agricultural University, Tai'an, Shandong, China

\*zhxy@sdau.edu.cn

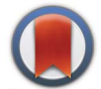

CrossMark  
click for updates

**OPEN ACCESS**

**Citation:** Zhang WY, Xu YC, Li WL, Yang L, Yue X, et al. (2014) Transcriptional Analyses of Natural Leaf Senescence in Maize. PLoS ONE 9(12): e115617. doi:10.1371/journal.pone.0115617

**Editor:** Tianzhen Zhang, Nanjing Agricultural University, China

**Received:** June 2, 2014

**Accepted:** November 27, 2014

**Published:** December 22, 2014

**Copyright:** © 2014 Zhang et al. This is an open-access article distributed under the terms of the [Creative Commons Attribution License](http://creativecommons.org/licenses/by/4.0/), which permits unrestricted use, distribution, and reproduction in any medium, provided the original author and source are credited.

**Data Availability:** The authors confirm that all data underlying the findings are fully available without restriction. All sequence data are available at the ArrayExpress database (accession number E-MTAB-1709).

**Funding:** This work was financially supported by grants from the Key Projects of National Plant Transgenic Genes of China (To XSZ and XYZ, Project no. 2013ZX08003-003) from Ministry of Agriculture of the People's Republic of China (<http://english.agri.gov.cn/>). The funders had no role in study design, data collection and analysis, decision to publish, or preparation of the manuscript.

**Competing Interests:** The authors have declared that no competing interests exist.

## Abstract

Leaf senescence is an important biological process that contributes to grain yield in crops. To study the molecular mechanisms underlying natural leaf senescence, we harvested three different developmental ear leaves of maize, mature leaves (ML), early senescent leaves (ESL), and later senescent leaves (LSL), and analyzed transcriptional changes using RNA-sequencing. Three sets of data, ESL vs. ML, LSL vs. ML, and LSL vs. ESL, were compared, respectively. In total, 4,552 genes were identified as differentially expressed. Functional classification placed these genes into 18 categories including protein metabolism, transporters, and signal transduction. At the early stage of leaf senescence, genes involved in aromatic amino acids (AAAs) biosynthetic process and transport, cellular polysaccharide biosynthetic process, and the cell wall macromolecule catabolic process, were up-regulated. Whereas, genes involved in amino acid metabolism, transport, apoptosis, and response to stimulus were up-regulated at the late stage of leaf senescence. Further analyses reveals that the transport-related genes at the early stage of leaf senescence potentially take part in enzyme and amino acid transport and the genes upregulated at the late stage are involved in sugar transport, indicating nutrient recycling mainly takes place at the late stage of leaf senescence. Comparison between the data of natural leaf senescence in this study and previously reported data for *Arabidopsis* implies that the mechanisms of leaf senescence in maize are basically similar to those in *Arabidopsis*. A comparison of natural and induced leaf senescence in maize was performed. Although many basic biological processes involved in senescence occur in both types of leaf senescence, 78.07% of differentially expressed genes in natural leaf senescence were not identifiable in induced leaf senescence, suggesting that differences in gene regulatory network may exist between these two leaf senescence programs.

Thus, this study provides important information for understanding the mechanism of leaf senescence in maize.

## Introduction

During the life-cycle, a leaf undergoes at least three different development phases: a functional increasing phase at the early growth stage; a full functionality phase at the mature stage; and a functionality decreasing phase at the senescence stage [1]. Although leaf senescence is regarded as a massive operation of programmed cell death, it contributes critically to plant fitness by controlling the remobilization of micro- and macro-nutrients to growing and reproductive organs. It is a complex developmental process that is controlled by interactions of various internal (e.g., age and hormones) and environmental factors (e.g., drought and UV-B irradiation) [2, 3]. During senescence, numerous changes occur at the organic, cellular, and molecular levels in a highly synchronized manner [4].

Previous studies have elucidated the molecular mechanisms underlying leaf senescence through identification and characterization of senescence-associated genes (SAGs) and senescence-related mutants in plants such as *Arabidopsis* [5–15]. Genetic and genome-wide analyses suggest that the regulation of gene expression is complex during leaf senescence, with a large number of genes exhibiting differential expression patterns during senescence. At the onset of leaf senescence, a subset of SAGs is up-regulated and the majority of genes expressed in non-senescent leaves are down-regulated, including photosynthesis-related genes.

Transcription factors (TFs) mediate gene expression by activating and suppressing the expression of target genes [16, 17]. They play important roles in the regulation of leaf senescence in *Arabidopsis*. The largest groups of senescence-related TFs include members of the NAM, ATAF, CUC (NAC), WRKY, MYB, C2H2 zinc-finger, bZIP, APETALA2, and ethylene-responsive element binding protein (AP2/EREBP) families [55]. Among these, a number of WRKY TFs *WRKY6*, *WRKY18*, *WRKY22*, *WRKY29*, *WRKY53*, *WRKY54*, and *WRKY70* are involved in the regulation of plant defense and senescence in *Arabidopsis* [9, 18–22]. Several members of the NAC family of TFs function in regulating *Arabidopsis* senescence [23]. Mutants of *NAC092/AtNAC2/ORESARA1 (ORE1)*, which encodes a senescence-promoting regulator, delay leaf senescence [24]. Seventy-eight SAGs from 170 genes downstream of *ORE1* were significantly up-regulated in *ORE1*-overexpressing plants [25]. Of these, *BIFUNCTIONAL NUCLEASE1 (BFN1)*, *SINA1*, and *SAG29/SWEET15* are direct targets of *ORE1* [26]. Some NAC genes are up-regulated by *ORE1* during leaf senescence [8]. For example, *NAP* and *ORS1* have been characterized as senescence-promoting regulators. Their mutants exhibit delayed leaf senescence, and plants overexpressing these genes display early leaf yellowing during leaf senescence [15, 23, 27]. *VND-*

*INTERACTING2* (*VNI2*) encodes a NAC transcription factor and serves as a molecular integrator between abscisic acid signals and leaf senescence [28]. Leaf aging was delayed in *VNI2*-overexpressing plants and accelerated significantly in *vni2-1* mutant. Other TFs, such as AtARF2, AtARR2, AtMYB2, and MtATB2 have also been shown to be involved in plant senescence [29–32]. Therefore, TFs play essential roles in the fine-tuning of the senescence of plants. However, their biological function in senescence remains to be investigated.

A typical feature of plant senescence is the ordered degradation of macromolecules and the redistribution of products in plant tissues. Transporters are the elementary carriers of substances in plants, and they play an important role in various plant developmental processes, including leaf senescence. In a large-scale microarray study, 74 putative transporter (TPs) genes showed increased expression during developmental senescence in *Arabidopsis* [6]. During natural leaf senescence, the expression of 153 TPs genes was enhanced [7]. Up-regulation of amino acid and oligopeptide TPs correlates with extensive protein degradation during senescence, and they export breakdown products to the sink organs [33]. In crops, the remobilization of nutrients from vegetative parts to reproductive structures during leaf senescence can influence crop productivity [34], and TPs are involved in the process of nutrient remobilization. Further elucidation and characterization of the molecular functions of TPs involved in plant senescence is likely to provide important information for crop genetic improvements.

As a powerful tool in plant biology studies, high-throughput gene expression analysis has allowed for the investigation of molecular mechanisms underlying leaf senescence on a whole-genome basis [5–8, 10, 35]. In addition to developmental regulation, leaf senescence can be induced by various stresses including darkening and starvation. Comparative transcriptome analysis demonstrated that gene expression patterns and signalling pathways in natural leaf senescence are significantly different from those in induced leaf senescence [6, 7].

Maize is an important crop that undergoes whole plant senescence to maximize energy input into reproductive structures, which has a direct affect upon productivity. Understanding the underlying molecular mechanisms of maize leaf senescence will be helpful for improvements in yield. Transcriptional analysis has previously been performed during induced senescence by preventing pollination in maize [10]. However, the transcriptional profile in the natural leaf senescence of maize remains to be investigated. In this study, the global gene expression profile of the leaf at three important developmental stages during natural leaf senescence was investigated through RNA sequencing (RNA-Seq) analysis. In total, 4,552 differentially expressed genes were identified, including both well-known and candidate genes involved in the natural leaf senescence of maize. Gene ontology (GO) analysis revealed that the enrichment of genes differentially expressed during maize leaf senescence was focused on 12 biological pathways. A comparison of transcriptional data was conducted between maize and *Arabidopsis* [5], and between natural and induced leaf senescence [10] in maize. These data further our understanding of the regulation mechanisms underlying leaf senescence in maize.

## Results and Discussion

### RNA-Seq analysis of natural leaf senescence at three developmental stages

Generally, a leaf goes through three main development phases: an expansion phase, a maturity phase, and a senescence phase [36]. The second phase, the time from the maturity of a leaf to the onset of leaf senescence is considered the functional phase attributing to crop yield. The ear leaf, the largest leaf in maize plant, is thought to play an important role in nutrient recycling to the cob during leaf senescence [37]. The timing of maize leaf senescence varies depends on the varieties [37]. The chlorophyll content and photosynthesis capacity in the ear leaf of inbred Q319 will declines approximately two weeks after pollen shed [38]. According to the physiological change of the ear leaf, the developing ear leaf after pollination can be divided into three classes: mature leaves [ML, 0–14 days after pollination (DAP)]; early senescent leaves (ESL, 15–24 DAP); and later senescent leaves (LSL, 25–30 DAP). In ML, the chlorophyll content in the ear leaf remains at the maximum level, and the photosynthesis rate reaches its peak value. In ESL, the chlorophyll content begins to decrease, and the photosynthesis rate slows. In LSL, complexes of chlorophyll and proteins are degraded, and the photosynthetic capacity of the leaf declines sharply. To confirm these three leaf classes, we harvested ear leaves at 12 DAP, 20 DAP, and 28 DAP, representing ML, ESL, and LSL, respectively (Fig. 1A–C), and determined the expression of *See1* [37, 39], a maize ortholog of the *Arabidopsis* senescence marker gene *SAG12* [18, 40, 41]. In leaves, *See1* was expressed at a low level at 12 DAP, while its expression was up-regulated approximately 6-fold at 20 DAP (Fig. 1D). Expression then fell to a very low level at 28 DAP (Fig. 1D). Therefore, these samples met the criterion for the leaf senescence process and could be used in this study.

To identify genes involved in the leaf senescence process, we sequenced three cDNA libraries, ML (12 DAP), ESL (20 DAP), and LSL (28 DAP) using an Illumina HiSeq™ 2000. After removal of dirty raw reads, the number of filtered clean reads in each library was 11,914,022, 12,381,189, and 11,788,942, respectively (S1 Table), a tag density deemed sufficient for quantitative analysis of gene expression. To determine the genes corresponding to the reads in the three libraries, the filtered clean reads were mapped to version 2 of the maize B73 reference genome (AGPv2) [42] using the Short Oligo-nucleotide Alignment Program 2 (SOAP2) aligner [43]. To ensure that the libraries were meaningful, reads that appeared only once were eliminated from further statistical analysis. The analysis was extended to investigate global patterns of gene expression during the three developmental stages of leaf senescence to identify common and different characteristics. Both unique and overlapping genes were detected in the three samples. In all, 19,492 (ML), 20,566 (ESL), and 20,429 (LSL) genes were detected (Fig. 2A, S2 Table). A total of 17,802 genes (91.33% of expressed genes in ML, 86.56% of expressed genes in ESL, and 87.14% of expressed genes in LSL) were constitutively expressed at the three stages (Fig. 2A).

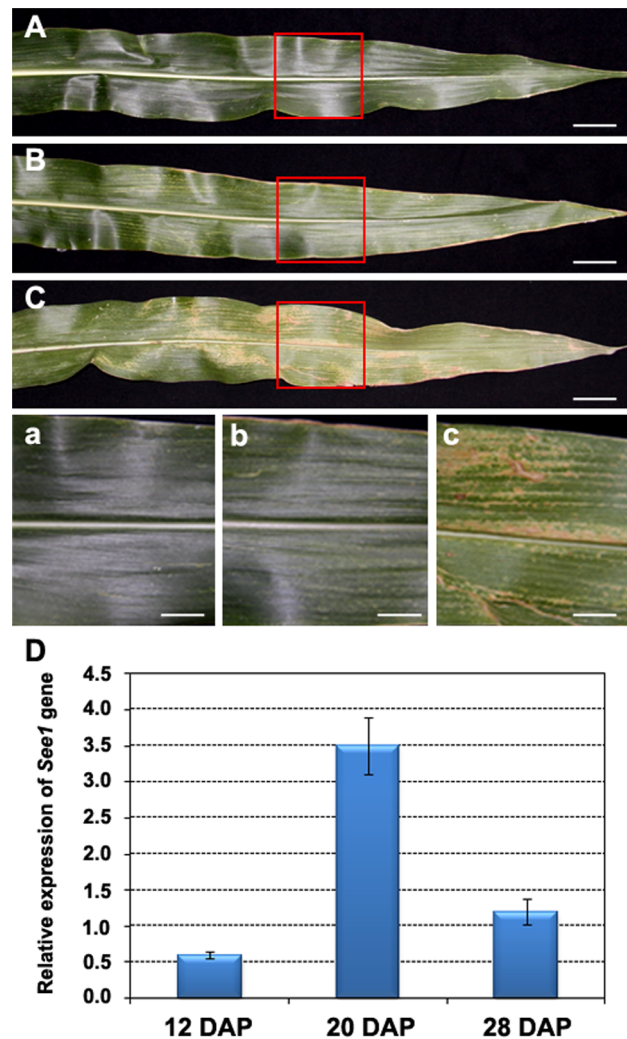

**Fig. 1. Morphology and molecular identification of leaf tissues for RNA-sequencing.** (A–C) Maize ear leaves at three different developmental stages: (A) 12 DAP, (B) 20 DAP, and (C) 28 DAP. Picture in (a), (b), and (c) is close-up views of the region labelled in the red box in A–C, respectively. (D) *See1* gene expression patterns in leaves at three different developmental stages. Scale bars = 100 mm (A–C), 1 cm (a to c).

doi:10.1371/journal.pone.0115617.g001

To establish relationships between the experimental samples, a Pearson correlation coefficient (PCC) analysis was performed on the sequencing libraries of the three samples. The gene expression profiles in ESL and LSL showed higher similarities (PCC - ESL/LSL = 0.817) than those of ML and ESL (PCC - ML/ESL = 0.756) (Fig. 2B).

### Changes in gene expression profiles in maize senescent leaf

To screen for genes differentially expressed during the natural senescence of maize leaves, significance of digital gene expression analysis was performed [44]. Three sets of data were compared: ESL vs. ML, LSL vs. ML, and LSL vs. ESL. All genes



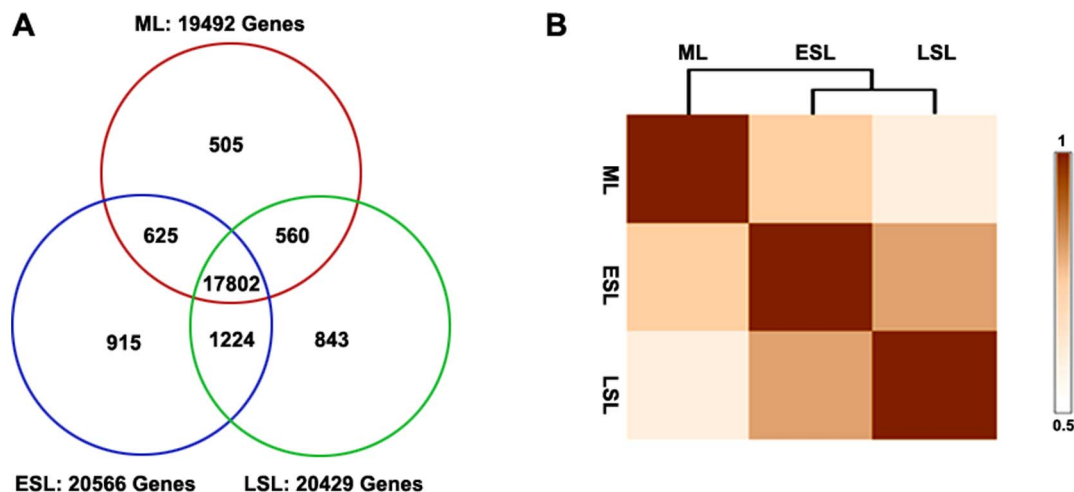

**Fig. 2. Gene expression of maize leaves during natural senescence and correlation matrices of their RNA-seq libraries.** (A) Distribution of genes expressed in the three studied maize leaves. (B) Spearman correlation coefficient analysis of the RNA-seq libraries.

doi:10.1371/journal.pone.0115617.g002

with different expression in three defined samples were defined as the differentially expressed genes (DEGs) during the leaf senescence. With the filter criteria of fold change  $\geq 2.0$  and false discovery rate (FDR)  $\leq 0.001$ , 2,771, 2,082, and 3,117 DEGs were identified derived from the three selected comparisons, respectively ([S3 Table](#)). In the first comparison (ESL/ML), the expression of 1,773 genes was up-regulated, whereas 998 genes were down-regulated ([S3A Table](#)). In the second comparison (LSL/ML), the expression of 1,144 genes were increased and 945 genes were declined ([S3B Table](#)). In the third comparison (LSL/ESL), 1,999 genes had peak expression in LSL, and 1,118 genes had peak expression in ESL ([S3C Table](#)).

To determine the accuracy of the RNA-seq data, quantitative reverse-transcription PCR (RT-qPCR) analysis of the differentially expressed genes was conducted to verify the expression patterns in the three samples. The expression of 26 randomly selected genes ([S4 Table](#)), including 15 genes with function annotation, eight genes encoding putative proteins, and three unknown genes, was analyzed by qRT-PCR. The expression patterns obtained by qRT-PCR strongly correlated with the RNA-seq results ( $R=0.854$ ), indicating that the RNA-seq data was reliable ([Fig. 3](#)).

To understand the functions of genes with changed expression during leaf senescence, genes were classified into 18 functional categories in accordance with MapMan annotation [45]. As shown in [Fig. 4](#), the largest category was unknown genes (33.19%). Most well-annotated genes were involved in protein (10.17%), RNA (8.24%), miscellaneous (6.35%), transport (6.17%), signalling (5.69%), other substance metabolism (5.69%), stress (4.77%), secondary metabolism (3.05%), photosynthesis (2.50%), cell (2.46%), lipid metabolism (2.46%), hormone metabolism (2.15%), development (1.98%), cell wall (1.47%), amino acid metabolism (1.45%), DNA (1.16%), and redox (1.03%) processes.

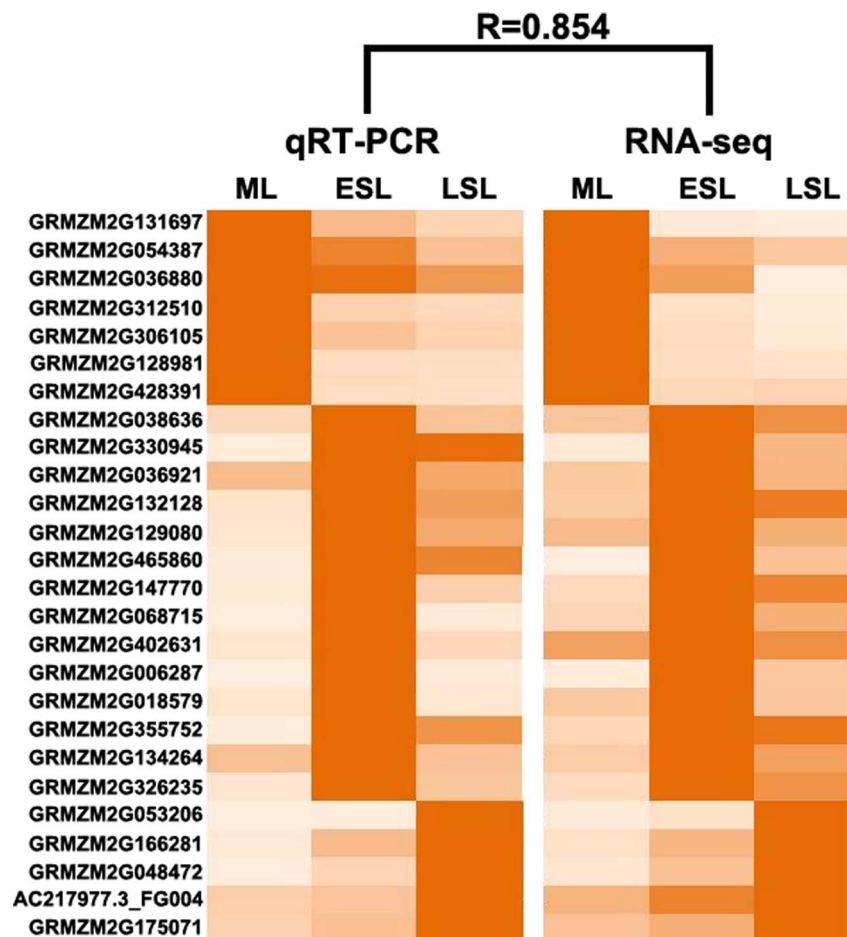

**Fig. 3. Validation of RNA-seq results by RT-qPCR.** Expression levels of 26 randomly selected genes from the three studied samples as detected by qRT-PCR. Expression levels represented by the two heat maps are the average of gene expression values from three independent real-time PCR experiments (left), and normalized RPKM values of RNA-seq analysis (middle). For each gene, the tissue with the maximum expression level was regarded as 100, and relative expression levels of the other three tissues were calculated according to this maximum level. Relative expression is represented by colour scales as indicated (right). R is the correlation coefficient value between the two platforms.

doi:10.1371/journal.pone.0115617.g003

Chlorophyll content is a well-established senescence marker, with its degradation an integral part of the senescence syndrome. With the decline of the chlorophyll content, the photosynthetic rate is also markedly decreased during the senescence process. Leaf senescence is usually accompanied by decreased expression of genes involved in photosynthesis. In this study, photosynthetic genes were the most important group, and they were markedly down-regulated during leaf senescence, especially in the later stage (from 20 DAP to 28 DAP) (S3 Table). The expression of *GRMZM2G094224*, a *pasL* (*At4g12800*) homologue gene encoding subunit L of the photosystem I reaction center in *Arabidopsis* [46], was significantly down-regulated ( $\log_2\text{Ratio} = -16.818$ ) and was barely detectable in LSL. In the comparison between LSL and ESL, 50 of the 2,084

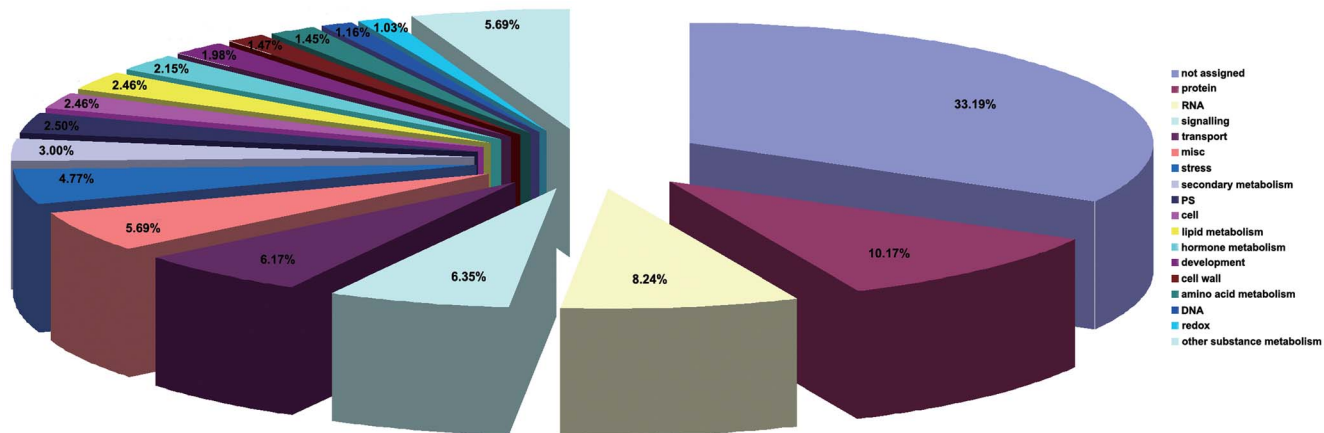

**Fig. 4. Classification of differentially expressed genes in maize leaves during natural senescence.** Classification results were obtained using the MapMan approach.

doi:10.1371/journal.pone.0115617.g004

differently expressed genes were down-regulated significantly, and ten genes were up-regulated (Table 1). Further analysis revealed that five up-regulated genes were involved in carbon metabolism that is specific to C<sub>4</sub> plant photosynthesis (Table 1). It is likely that up-regulation of these genes provides essential energy for the maintenance of normal metabolism in maize during late senescence stage, even though the photosynthetic capacity was reduced at this stage.

During plant development, leaf senescence is a pivotal process for the recycling of nutrients from senescing leaves to developing sinks, such as young leaves and seeds. In senescing leaf, complex macromolecules, including proteins, are broken down, and approximately two-thirds of the soluble proteins in plant cells are lost [2]. Therefore, protein degradation is an important symptom of senescence. Consistent with the decline of most proteins levels, representatives of the major classes of proteases (cysteine (Cys)-, aspartic-, serine-, and metallo-proteases) increased their activity or transcript expression levels [2]. In this study, genes involved in protein metabolism made up the largest group of differentially expressed genes during leaf senescence; 45.5% of protein metabolism genes (210 genes) were related to protein degradation (Fig. 5). *SAG12* encodes a senescence-specific papain-like Cys-protease in *Arabidopsis* [47]. Its maize ortholog, *See1* (*GRMZM2G045706*), had an up-regulated transcript level during leaf senescence. Expression of *GRMZM2G048836*, which encodes a metallo-protease, was enhanced 8.23-fold during senescence. In *Arabidopsis*, its ortholog FtsH6 is involved in the degradation of Lhcb3 and Lhcb1 during senescence [48, 49].

Further analysis revealed that 60.07% of the up-regulated genes involved in protein degradation at earlier stages of leaf senescence (from 12 to 20 DAP) encode proteases in the ubiquitin-proteasome pathway (Fig. 5). Genetic studies revealed that this pathway performs an important regulatory role in leaf senescence [21, 50–52]. We determined that the *GRMZM2G405203* gene was largely enhanced during the leaf senescence process. Its *Arabidopsis* ortholog,



**Table 1.** The differentially expressed photosynthesis associated genes in maize leaf during natural senescence.

| GeneID                     | log <sub>2</sub> <sup>(LSL/ESL)</sup> | Gene Expression Change | Annotations                                                                          |
|----------------------------|---------------------------------------|------------------------|--------------------------------------------------------------------------------------|
| GRMZM2G089365              | 1.81                                  | up-regulated           | PS.calvin cycle.aldolase                                                             |
| AC203966.5_FG002           | 3.89                                  | up-regulated           | PS.lightreaction.cyclic electron flow-chlororespiration                              |
| GRMZM2G320305              | 2.11                                  | up-regulated           | PS.lightreaction.other electron carrier (ox/red).ferredoxin reductase                |
| GRMZM2G159587              | 1.51                                  | up-regulated           | PS.photorespiration.hydroxypyruvate reductase                                        |
| GRMZM2G358153              | 4.26                                  | up-regulated           | PS, calvin cycle, rubisco interacting                                                |
| GRMZM2G066413 <sup>a</sup> | 1.43                                  | up-regulated           | PS, carbon concentrating mechanism, C4 (phosphate/ Phosphoenolpyruvate translocator) |
| GRMZM2G069542 <sup>a</sup> | 1.08                                  | up-regulated           | PS, carbon concentrating mechanism, C4 (phosphoenolpyruvate carboxylase)             |
| GRMZM2G085019 <sup>a</sup> | 1.32                                  | up-regulated           | PS, carbon concentrating mechanism, C4 (NADP-malic enzyme)                           |
| GRMZM2G118770 <sup>a</sup> | 1.72                                  | up-regulated           | PS, carbon concentrating mechanism, C4 (NADP-malic enzyme)                           |
| GRMZM2G348512 <sup>a</sup> | 2.77                                  | up-regulated           | PS, carbon concentrating mechanism, C4 (Carbonic Anhydrase)                          |
| GRMZM2G155253              | -1.16                                 | down-regulated         | PS.calvin cycle.aldolase                                                             |
| GRMZM2G306732              | -1.54                                 | down-regulated         | PS.calvin cycle.FBPase                                                               |
| GRMZM2G089136              | -1.44                                 | down-regulated         | PS.calvin cycle.phosphoglycerate kinase                                              |
| GRMZM2G450762              | -1.57                                 | down-regulated         | PS.calvin cycle.rubisco large subunit                                                |
| GRMZM2G179146              | -1.23                                 | down-regulated         | PS.lightreaction.ATP synthase                                                        |
| GRMZM2G448142              | -1.23                                 | down-regulated         | PS.lightreaction.ATP synthase.beta subunit                                           |
| GRMZM2G025171              | -1.43                                 | down-regulated         | PS.lightreaction.ATP synthase.delta chain                                            |
| GRMZM2G391831              | -2.24                                 | down-regulated         | PS.lightreaction.ATP synthase.subunit C                                              |
| GRMZM2G075958              | -1.02                                 | down-regulated         | PS.lightreaction.cyclic electron flow-chlororespiration                              |
| GRMZM2G102349              | -1.12                                 | down-regulated         | PS.lightreaction.cyclic electron flow-chlororespiration                              |
| GRMZM2G086763              | -1.26                                 | down-regulated         | PS.lightreaction.cyclic electron flow-chlororespiration                              |
| GRMZM2G012119              | -1.95                                 | down-regulated         | PS.lightreaction.cyclic electron flow-chlororespiration                              |
| GRMZM2G167766              | -1.01                                 | down-regulated         | PS.lightreaction.cytochrome b6/f                                                     |
| GRMZM2G162748              | -1.21                                 | down-regulated         | PS.lightreaction.cytochrome b6/f                                                     |
| GRMZM2G038365              | -1.38                                 | down-regulated         | PS.lightreaction.cytochrome b6/f                                                     |
| GRMZM2G463640              | -1.21                                 | down-regulated         | PS.lightreaction.cytochrome b6/f.cytochrome b6 (CYB6)                                |
| GRMZM2G109244              | -1.38                                 | down-regulated         | PS.lightreaction.NADH DH                                                             |
| GRMZM2G154667              | -1.45                                 | down-regulated         | PS.lightreaction.NADH DH                                                             |
| GRMZM2G304947              | -1.82                                 | down-regulated         | PS.lightreaction.NADH DH                                                             |
| GRMZM2G475437              | -1.88                                 | down-regulated         | PS.lightreaction.NADH DH                                                             |
| GRMZM2G176129              | -2.60                                 | down-regulated         | PS.lightreaction.NADH DH                                                             |
| GRMZM2G032253              | -1.51                                 | down-regulated         | PS.lightreaction.other electron carrier (ox/red).ferredoxin                          |
| GRMZM2G122337              | -1.95                                 | down-regulated         | PS.lightreaction.other electron carrier (ox/red).ferredoxin                          |
| GRMZM2G084279              | -1.54                                 | down-regulated         | PS.lightreaction.other electron carrier (ox/red).ferredoxin oxidoreductase           |
| GRMZM2G059191              | -1.27                                 | down-regulated         | PS.lightreaction.other electron carrier (ox/red).ferredoxin reductase                |
| GRMZM2G168143              | -1.39                                 | down-regulated         | PS.lightreaction.other electron carrier (ox/red).ferredoxin reductase                |
| GRMZM2G071450              | -1.14                                 | down-regulated         | PS.lightreaction.other electron carrier (ox/red).plastocyanin                        |
| GRMZM2G016622              | -1.03                                 | down-regulated         | PS.lightreaction.photosystem I.PSI polypeptide subunits                              |
| GRMZM2G001653              | -1.11                                 | down-regulated         | PS.lightreaction.photosystem I.PSI polypeptide subunits                              |
| GRMZM2G085646              | -1.15                                 | down-regulated         | PS.lightreaction.photosystem I.PSI polypeptide subunits                              |
| GRMZM2G017290              | -1.37                                 | down-regulated         | PS.lightreaction.photosystem I.PSI polypeptide subunits                              |

Table 1. Cont.

| GeneID        | log <sub>2</sub> (LSL/ESL) | Gene Expression Change | Annotations                                               |
|---------------|----------------------------|------------------------|-----------------------------------------------------------|
| GRMZM2G012397 | -1.46                      | down-regulated         | PS.lightreaction.photosystem I.PSI polypeptide subunits   |
| GRMZM2G024150 | -1.85                      | down-regulated         | PS.lightreaction.photosystem I.PSI polypeptide subunits   |
| GRMZM2G057281 | -1.04                      | down-regulated         | PS.lightreaction.photosystem II.LHC-II                    |
| GRMZM2G033885 | -1.88                      | down-regulated         | PS.lightreaction.photosystem II.LHC-II                    |
| GRMZM2G132506 | -1.05                      | down-regulated         | PS.lightreaction.photosystem II.PSII polypeptide subunits |
| GRMZM2G101617 | -1.11                      | down-regulated         | PS.lightreaction.photosystem II.PSII polypeptide subunits |
| GRMZM2G308944 | -1.13                      | down-regulated         | PS.lightreaction.photosystem II.PSII polypeptide subunits |
| GRMZM2G436986 | -1.15                      | down-regulated         | PS.lightreaction.photosystem II.PSII polypeptide subunits |
| GRMZM2G176840 | -1.24                      | down-regulated         | PS.lightreaction.photosystem II.PSII polypeptide subunits |
| GRMZM2G067883 | -1.53                      | down-regulated         | PS.lightreaction.photosystem II.PSII polypeptide subunits |
| GRMZM2G394732 | -1.54                      | down-regulated         | PS.lightreaction.photosystem II.PSII polypeptide subunits |
| GRMZM2G134130 | -1.88                      | down-regulated         | PS.lightreaction.photosystem II.PSII polypeptide subunits |
| GRMZM2G166899 | -3.09                      | down-regulated         | PS.photorespiration.hydroxypyruvate reductase             |

Genes labelled “a” are specific to C<sub>4</sub> plant photosynthesis.

doi:10.1371/journal.pone.0115617.t001

*ORE9*, encodes an F-box protein, a component of the SCF complex that acts as an E3 ligase in ubiquitin-dependent proteolysis; an *ore9* mutation delayed leaf senescence in *Arabidopsis* [53].

TFs activate/suppress target gene expression by binding to distinct cis-elements. These are generally located in the 5' upstream regulatory regions of target genes.

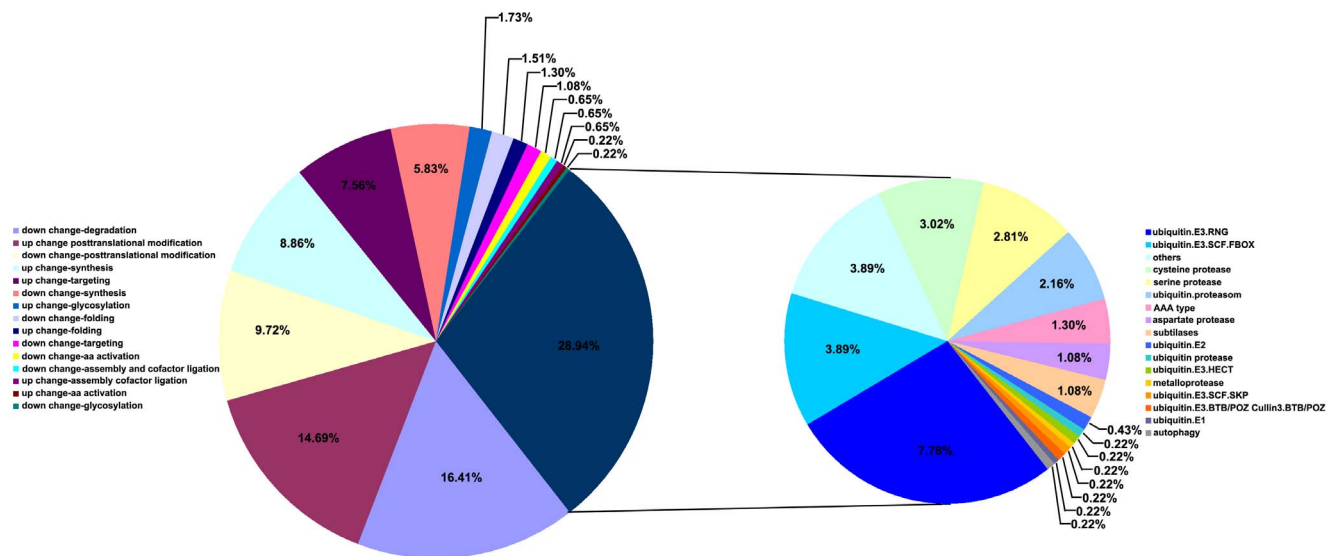

Fig 5. Distribution of protein metabolic related genes in early stage leaf senescence differentially expressed gene set. Protein metabolic related genes differentially expressed in early stage leaf senescence were classified into 16 categories by MapMan. Genes involved in protein degradation are shown to the right.

doi:10.1371/journal.pone.0115617.g005

Among all genes annotated in the *Arabidopsis* nuclear genome [54], 185 TF genes were identified as being differentially regulated during leaf senescence [55]. The largest groups of senescence-regulated TFs were classified into the NAC, WRKY, MYB, C2H2 zinc-finger, bZIP, and AP2/EREBP families [55]. In maize, approximately 3355 TFs were identified and classified into 56 families [16, 17]. We identified 233 genes encoding transcription factors from the genes differentially expressed during maize leaf senescence. These were distributed into 35 subfamilies, including MYB, bHLH, C2H2, NAC, AP2/EREBP, and bZIP families (S5 Table). Many TFs involved in leaf senescence have been previously characterized [9, 11, 15, 25, 26–28, 32, 56–61]. The WRKY and NAC subfamilies represent the largest groups and are well-documented [9, 15, 20, 23, 26, 28, 59–63]. WRKY53 and ANAC092 (ORE1) act as positive regulators in *Arabidopsis* leaf senescence [20, 23, 24, 26, 62]. Expression of their maize orthologs was induced during leaf senescence (Table 2), suggesting that they also play important roles in the maize leaf senescence process.

There were 33 MYB (MYB-related) and 15 bZIP TF genes with changed expression during leaf senescence (S5 Table), implying that these two large families are involved in maize leaf senescence. This provides an important cue to characterize their function during leaf senescence. Furthermore, 176 of the 236 TFs are found in the plant TFs database described by Zhang et al. (2011) [17] and Pérez-Rodríguez et al. (2010) [16]. The other 60 TFs were considered new transcription factor family members. Their function in maize leaf senescence will be required to be investigated by genetic and molecular analysis.

## GO analysis of genes differentially expressed during natural leaf senescence

Although the functional classification of differentially expressed genes reveals their numbers in each category, the roles of some small gene families in specific biological processes are often ignored. Gene ontology reveals the distribution of every class of gene, both in target samples and in the whole genome, and yields the ontology of defined terms, including the biological process, cellular component, and molecular function, enriched in the target samples using statistical methods. We performed GO analysis on the data using the agriGO toolkit developed by Du et al. (2010) [64] (S6 Table).

The GO analysis revealed that the enrichment of genes differentially expressed during maize leaf senescence focused on 12 biological pathways (Fig. 6). At the early stage of leaf senescence, five pathways including aromatic amino acids (AAAs) biosynthetic process and transport, threonine metabolic process, cellular polysaccharide biosynthetic process, and the cell wall macromolecule catabolic process, were enriched in the up-regulated genes cluster, whereas only one pathway, photosynthesis, was enriched in the down-regulated genes cluster. However, the enriched biological pathways at the late stage were different from those at the early stage. Four pathways, including protein amino acid phosphorylation, transmembrane transport, apoptosis, and response to stimulus

**Table 2.** Genes show high similarity to well-known SAGs in the SDEG dataset.

| GENE ID (Maize)  | Homologous gene in Arabidopsis | Gene Description                                                  | Function Annotation                                      | Reference(s) |
|------------------|--------------------------------|-------------------------------------------------------------------|----------------------------------------------------------|--------------|
| AC234526.1_FG005 | AT1G09500                      | cinnamyl-alcohol dehydrogenase family/CAD family (AtSAG26)        | Up-regulated during developmental and induced senescence | [7, 82]      |
| GRMZM2G032977    | AT1G11190                      | BIFUNCTIONAL NUCLEASE I (BFN1)                                    | Nucleic acid degradation during senescence               | [6, 83]      |
| GRMZM2G088212    | AT1G20620                      | Catalase 3(CAT3), SENESCENCE 2                                    | Induced by age and senescence                            | [84, 85]     |
| GRMZM2G119168    | AT1G20900                      | AHL27, AT-HOOK MOTIF NUCLEAR-LOCALIZED PROTEIN 27                 | Delayed leaf senescence                                  | [86]         |
| GRMZM2G047404    | AT1G61800                      | GLUCOSE-6-PHOSPHATE/PHOSPHATE TRANSLOCATOR 2 (GPT2)               | Senescence associated gene                               | [41, 87]     |
| AC207347.3_FG005 | AT1G73220                      | ORGANIC CATION/CARNITINE TRANSPORTER1 (OCT1)                      | Strong senescence up-regulation                          | [88]         |
| GRMZM2G001645    | AT1G76490                      | HYDROXY METHYLGLUTARYL COA REDUCTASE 1 (HMG1)                     | Negative regulator of leaf senescence                    | [89]         |
| GRMZM2G106303    | AT1G76680                      | 12-OXOPHYTODIENOATE REDUCTASE 1 (OPR1)                            | Up-regulated by senescence and jasmonic acid             | [90]         |
| GRMZM2G125943    | AT2G01830                      | CRE1/AHK4                                                         | Programmed cell death                                    | [91]         |
| GRMZM2G151223    | AT2G01830                      | CRE1/AHK4                                                         | Programmed cell death                                    | [91]         |
| GRMZM2G074236    | AT2G35980                      | YELLOW-LEAF-SPECIFIC GENE 9 (YLS9)                                | Induced during senescence.                               | [92]         |
| GRMZM2G405203    | AT2G42620                      | ORESARA 9 (ORE9)                                                  | Positive regulator of leaf senescence                    | [53]         |
| GRMZM2G163251    | AT2G43000                      | JUNGBRUNNEN 1 (JUB1), NAC DOMAIN CONTAINING PROTEIN 42 (NAC042)   | Over expression of the gene strongly delays senescence.  | [93]         |
| GRMZM2G112548    | AT2G43000                      | JUNGBRUNNEN 1 (JUB1), NAC DOMAIN CONTAINING PROTEIN 42 (NAC042)   | Over expression of the gene strongly delays senescence.  | [93]         |
| GRMZM2G051943    | AT2G43570                      | CHITINASE (CHI)                                                   | The senescence-enhanced genes                            | [94]         |
| GRMZM2G007848    | AT2G43790                      | MAP KINASE 6 (MPK6)                                               | Positive regulator of leaf senescence                    | [95]         |
| GRMZM2G084347    | AT2G43790                      | MAP KINASE 6 (MPK6)                                               | Positive regulator of leaf senescence                    | [95]         |
| GRMZM2G140811    | AT3G15730                      | phospholipase D $\alpha$ 1 (PLD $\alpha$ 1)                       | Positive regulator in ABA-promoted senescence            | [96]         |
| GRMZM2G004694    | AT3G18830                      | ARABIDOPSIS THALIANA POLYOL/MONOSACCHARIDE TRANSPORTER 5 (AtPLT5) | Abscission control                                       | [97]         |
| GRMZM2G062156    | AT3G18830                      | ARABIDOPSIS THALIANA POLYOL/MONOSACCHARIDE TRANSPORTER 5 (AtPLT5) | Abscission control                                       | [97]         |
| GRMZM2G302604    | AT3G18830                      | ARABIDOPSIS THALIANA POLYOL/MONOSACCHARIDE TRANSPORTER 5 (AtPLT5) | Abscission control                                       | [97]         |
| GRMZM2G063824    | AT3G18830                      | ARABIDOPSIS THALIANA POLYOL/MONOSACCHARIDE TRANSPORTER 5 (AtPLT5) | Abscission control                                       | [97]         |
| GRMZM5G862325    | AT3G18830                      | ARABIDOPSIS THALIANA POLYOL/MONOSACCHARIDE TRANSPORTER 5 (AtPLT5) | Abscission control                                       | [97]         |
| GRMZM2G339563    | AT3G44880                      | PHEOPHORBIDE A OXYGENASE (PAO)                                    | Positive regulator in leaf senescence                    | [98, 99]     |
| GRMZM2G018484    | AT3G44880                      | PHEOPHORBIDE A OXYGENASE (PAO)                                    | Positive regulator in leaf senescence                    | [98, 99]     |

Table 2. Cont.

| GENE ID (Maize)  | Homologous gene in Arabidopsis | Gene Description                                                                | Function Annotation                                                                                        | Reference(s)   |
|------------------|--------------------------------|---------------------------------------------------------------------------------|------------------------------------------------------------------------------------------------------------|----------------|
| GRMZM2G152739    | AT3G52430                      | PHYTOALEXIN DEFICIENT 4 (PAD4)                                                  | Involved in the GPA feeding-induced leaf senescence                                                        | [51, 100]      |
| AC217401.3_FG001 | AT3G60130                      | BETA GLUCOSIDASE 16, BGLU16                                                     | Leaf senescence associated genes                                                                           | [7]            |
| GRMZM2G108849    | AT4G01610                      | AtCathB3                                                                        | Up-regulated by dark-induced senescence.                                                                   | [101]          |
| GRMZM2G091837    | AT4G22920                      | ATNYE1, NON-YELLOWING 1, NYE1, SGR, STAY-GREEN                                  | Chlorophyll degradation                                                                                    | [102, 103]     |
| GRMZM2G030272    | AT4G23810                      | WRKY53                                                                          | Positive regulator of leaf senescence                                                                      | [20, 62]       |
| GRMZM2G060918    | AT4G23810                      | WRKY53                                                                          | Positive regulator of leaf senescence                                                                      | [20, 62]       |
| GRMZM2G103055    | AT4G25000                      | ALPHA-AMYLASE-LIKE (AMY1)                                                       | AMY1 is involved in senescence-associated starch degradation.                                              | [104]          |
| GRMZM2G081626    | AT4G32940                      | GAMMA VACUOLAR PROCESSING ENZYME (GAMMA-VPE)                                    | Up-regulated during senescence.                                                                            | [105]          |
| GRMZM2G093032    | AT4G32940                      | GAMMA VACUOLAR PROCESSING ENZYME (GAMMA-VPE)                                    | Up-regulated in senescence                                                                                 | [105]          |
| GRMZM2G000812    | AT5G13170                      | SENESCENCE-ASSOCIATED GENE 29 (SAG29)                                           | Leaf senescence associated genes                                                                           | [106]          |
| GRMZM2G324903    | AT5G13170                      | SENESCENCE-ASSOCIATED GENE 29 (SAG29)                                           | Leaf senescence associated gene                                                                            | [106]          |
| GRMZM2G109070    | AT5G13800                      | CO-REGULATED WITH NYE1 (CRN1), PHEOPHYTINASE (PPH)                              | Chlorophyll breakdown                                                                                      | [107]          |
| GRMZM2G048836    | AT5G15250                      | FTSH PROTEASE 6 (FTSH6)                                                         | FtsH6 is involved in the degradation of both Lhcb3 and Lhcb1 during senescence and high-light acclimation. | [48, 49]       |
| AC211394.4_FG004 | AT5G34850                      | PURPLE ACID PHOSPHATASE 26 (PAP26)                                              | Leaves of T-DNA insertion mutant displayed delayed senescence                                              | [108]          |
| GRMZM2G114850    | AT5G39610                      | NAC DOMAIN CONTAINING PROTEIN 2 (ATNAC2), ANAC092, ORESARA1 (ORE1)              | Positive regulator of leaf senescence                                                                      | [23, 24, 26]   |
| GRMZM2G327059    | AT5G41410                      | BELL1                                                                           | Positive regulator of leaf senescence                                                                      | [109]          |
| GRMZM2G144083    | AT5G44790                      | RESPONSIVE-TO-ANTAGONIST 1 (RAN1)                                               | ATP dependent copper transporter vital for ethylene response pathway                                       | [110]          |
| GRMZM2G045706    | AT5G45890                      | SENESCENCE-ASSOCIATED GENE 12 (SAG12)                                           | The senescence-specific gene                                                                               | [18, 40, 41]   |
| GRMZM2G172230    | AT5G51070                      | SENESCENCE ASSOCIATED GENE 15 (SAG15), EARLY RESPONSIVE TO DEHYDRATION 1 (ERD1) | Leaf senescence associated genes                                                                           | [40, 111, 112] |
| GRMZM2G040890    | AT5G51070                      | SENESCENCE ASSOCIATED GENE 15 (SAG15), EARLY RESPONSIVE TO DEHYDRATION 1 (ERD1) | Leaf senescence associated gene                                                                            | [40, 111, 112] |
| GRMZM2G164715    | AT5G51640                      | YELLOW-LEAF-SPECIFIC GENE 7, YLS7                                               | Leaf-senescence-related protein                                                                            | [7, 82]        |



Table 2. Cont.

| GENE ID (Maize) | Homologous gene in Arabidopsis | Gene Description                                                           | Function Annotation             | Reference(s) |
|-----------------|--------------------------------|----------------------------------------------------------------------------|---------------------------------|--------------|
| GRMZM2G165961   | AT5G51640                      | TRICHOME BIREFRINGENCE-LIKE 17 (TBL17), YELLOW-LEAF-SPECIFIC GENE 7 (YLS7) | leaf-senescence-related protein | [7, 82]      |
| GRMZM2G004183   | AT5G51640                      | TRICHOME BIREFRINGENCE-LIKE 17 (TBL17), YELLOW-LEAF-SPECIFIC GENE 7 (YLS7) | Leaf-senescence-related protein | [7, 82]      |

doi:10.1371/journal.pone.0115617.t002

were enriched in the up-regulated gene cluster. In addition to photosynthesis, oxidation-reduction and zinc ion transport were enriched in the down-regulated genes cluster. These results show the plant cells not only underwent cellular components and metabolism changes but also would take some protective steps to respond to those changes at the early stage of leaf senescence. Whereas, some processes, e.g. nutrient recycling and cell death, mainly occurred at the late stage. This indicates that there are some differences in molecular mechanisms between these stages during leaf senescence, thus implying the complexity of the senescence process.

### Genes involved in AAAs biosynthesis and metabolism might be involved in the regulation of natural leaf senescence

Amino acids with aromatic rings are characterized as AAAs, e.g., L-tryptophan, L-phenylalanine, and L-tyrosine. In plants, AAAs is required for the synthesis of proteins and also for precursors of a diverse range of important natural products [65]. Despite the well-known aspects of AAAs in plant growth, such as reproduction, defense, and environmental response, the roles of AAAs in leaf senescence are poorly understood. As mentioned above, genes involved in AAAs biosynthesis were enriched in the early stage of maize leaf senescence. Subcellular localization of the orthologs of these genes in *Arabidopsis* occurs in chloroplasts (Table 3), consistent with the fact that plastids contain a full set of biosynthetic enzymes for the production of all AAAs [65]. The content of amino acids increased during leaf senescence, which is considered to may have a role in the initiation of the senescence programme [66]. It was also reported that AAAs are important in the normal process of flower senescence [67]. Thus, the biosynthesis and metabolism of AAAs might play a role in the regulation of leaf senescence through catabolic processes in the chloroplasts, although the detailed experimental data need to be further provided in maize.

AAAs is precursors for the biosynthesis of flavonoids and phenylpropanoids that increase significantly during the senescence process [68, 69]. Flavonoids in plants have diverse biological functions and are involved in defense against stresses, signalling during nodulation, and pollen fertility [70]. Anthocyanins are a subgroup of flavonoids responsible for the leaf color transition observed in autumn in many plant species. This process is important for the protection of leaf

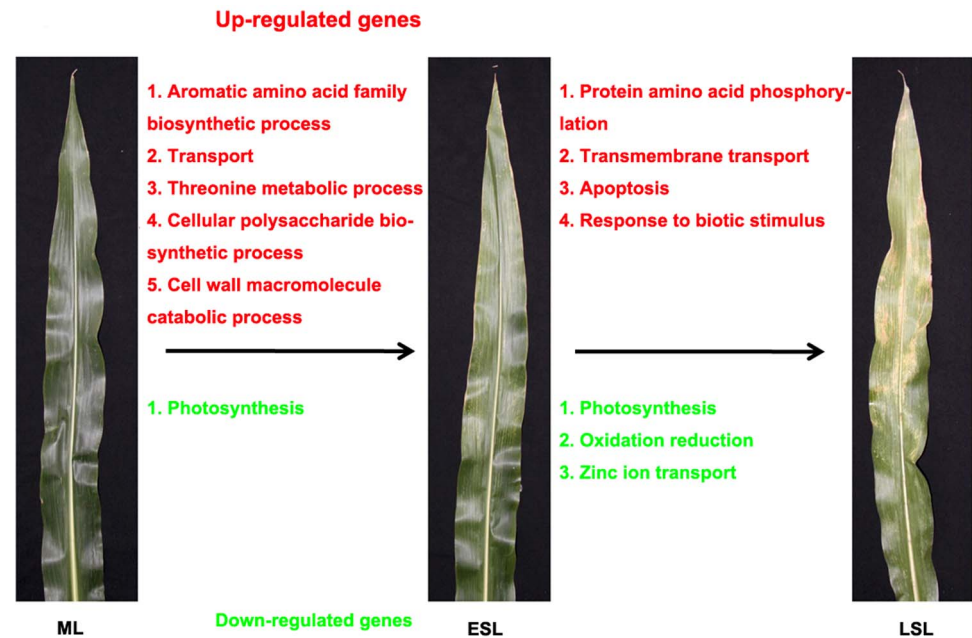

**Fig. 6. Overrepresented functional GO terms of differentially expressed genes in leaf senescence.** Using  $FDR < 0.05$  as a criterion, the overrepresented GO terms (biological process) were picked out using the agriGO analysis tool.

doi:10.1371/journal.pone.0115617.g006

cells against light damage during senescence [71]. It is generally considered that anthocyanins accumulate extensively during the late stage of leaf senescence. However, it was observed that the expression of genes encoding proteins for the biosynthesis of flavonoids and phenylpropanoids, including phenylalanine ammonia-lyase (PAL), cinnamate 4-hydroxylase (C4H), 4-coumaroyl:CoA ligase (4CL), chalcone synthase (CHS), chalcone isomerase (CHI), flavanone 3'-hydroxylase (F3'H), chalcone isomerase (CHI), dihydroflavonol 4-reductase (DFR), and leucoanthocyanidin dioxygenase (LDOX), increased in the early stage of leaf senescence (Fig. 7; S7 Table). This result suggests that anthocyanins were produced during the early stage of leaf senescence, which may attenuate the quality and quantity of light captured and protect the leaf from strong light damage.

### Genes encoding transporters might be required for nutrient remobilization during natural leaf senescence

In many monocotyledon plant species, fruit set and maturation are directly associated with whole-plant senescence. Leaf senescence is essential for the productivity of annual crops such as maize, rice, and wheat because it affects nutrient remobilization efficiency [1, 72]. Transporters play a crucial role in macromolecule degradation and nutrient recycling during plant senescence. Many genes encoding transporters, such as ABC transporters, amino acid permease, and cation exchangers, are senescence-associated, which is consistent with the

**Table 3.** The up-regulated genes involved in aromatic amino acid family biosynthetic process in early stage of maize leaf senescence.

| Gene ID       | Log <sub>2</sub> <sup>(ESL/ML)</sup> | Log <sub>2</sub> <sup>(LSL/ML)</sup> | Orthologous in <i>Arabidopsis</i> | Gene symbol    | Description                                                                                                                                            | Cellular component                         |
|---------------|--------------------------------------|--------------------------------------|-----------------------------------|----------------|--------------------------------------------------------------------------------------------------------------------------------------------------------|--------------------------------------------|
| GRMZM2G359822 | 1.27                                 | 1.51                                 | AT4G33510                         | <i>DHS2</i>    | phospho-2-dehydro-3-deoxyheptonate aldolase 2                                                                                                          | chloroplast, thylakoid                     |
| GRMZM2G161337 | 1.39                                 | 0.84                                 | AT2G29690                         | <i>ASA2</i>    | anthranilate synthase component I-2                                                                                                                    | chloroplast                                |
| GRMZM2G365160 | 2.04                                 | 2.13                                 | AT1G22410                         | \              | class-II DAHP synthetase-like protein                                                                                                                  | chloroplast                                |
| GRMZM2G454719 | 1.52                                 | 0.96                                 | AT1G22410                         | \              | class-II DAHP synthetase-like protein                                                                                                                  | chloroplast                                |
| GRMZM2G365961 | 2.51                                 | 2.33                                 | AT1G15710                         | \              | prephenate dehydrogenase family protein                                                                                                                | chloroplast                                |
| GRMZM2G164562 | 1.44                                 | 1.99                                 | AT1G48850                         | <i>EMB1144</i> | chorismate synthase                                                                                                                                    | chloroplast, stroma                        |
| GRMZM2G115841 | 2.17                                 | 1.41                                 | AT2G27820                         | <i>PD1</i>     | arogenate dehydratase 3                                                                                                                                | chloroplast                                |
| GRMZM2G003109 | 2.09                                 | -0.39                                | AT5G05730                         | <i>ASA1</i>    | anthranilate synthase component I-1                                                                                                                    | chloroplast, stroma                        |
| GRMZM2G051219 | 2.4                                  | 2.7                                  | AT5G17990                         | <i>TRP1</i>    | anthranilate phosphoribosyltransferase                                                                                                                 | chloroplast                                |
| GRMZM2G314652 | 0.13                                 | 2.64                                 | AT3G06350                         | <i>MEE32</i>   | NADP or NADPH binding, 3-dehydroquinate dehydratase activity, shikimate 5-dehydrogenase activity, binding, catalytic activity;                         | chloroplast stroma, chloroplast;           |
| GRMZM2G107639 | 0                                    | 3.05                                 | AT1G80360                         | \              | transferase activity, transferring nitrogenous groups, pyridoxal phosphate binding, catalytic activity;                                                | 25 plant structures                        |
| GRMZM2G026131 | 1.82                                 | 2.09                                 | AT1G80360                         | \              | transferase activity, transferring nitrogenous groups, pyridoxal phosphate binding, catalytic activity;                                                | 25 plant structures                        |
| GRMZM2G466534 | 0                                    | 2.74                                 | AT1G08250                         | <i>ADT6</i>    | arogenate dehydratase activity, prephenate dehydratase activity                                                                                        | chloroplast                                |
| GRMZM2G123122 | 1.29                                 | 1.77                                 | AT1G22610                         | \              | molecular_function unknown                                                                                                                             | chloroplast                                |
| GRMZM2G014376 | 1.92                                 | 1.45                                 | AT3G06350                         | <i>MEE32</i>   | NADP or NADPH binding, 3-dehydroquinate dehydratase activity, shikimate 5-dehydrogenase activity, binding, catalytic activity;                         | chloroplast stroma, chloroplast            |
| GRMZM2G029135 | 1.41                                 | 1.06                                 | AT1G80360                         | \              | transferase activity, transferring nitrogenous groups, pyridoxal phosphate binding, catalytic activity;                                                | 25 plant structures                        |
| GRMZM2G138382 | 2.94                                 | 0.79                                 | AT2G29690                         | <i>ASA2</i>    | anthranilate synthase activity;                                                                                                                        | chloroplast, anthranilate synthase complex |
| GRMZM2G171383 | 1.37                                 | 0.2                                  | AT1G25220                         | <i>ASB1</i>    | tryptophan biosynthetic process, response to ethylene stimulus, response to bacterium, auxin biosynthetic process, lateral root primordium development | chloroplast                                |

doi:10.1371/journal.pone.0115617.t003

substantial nutrient translocation during leaf senescence [5–7, 73–75]. In this study, the expression patterns of 263 genes predicted to encode transporters changed during leaf senescence, and GO analysis revealed that the biological process of transport was enriched in both early and late stage leaf senescence

(Fig. 6). These transporter proteins were categorized into 20 classes (Fig. 8A). The transport-related genes that were up-regulated at an early stage of leaf senescence potentially take part in enzyme and amino acid transport (Fig. 8B), suggesting that active metabolism occurs at the beginning of leaf senescence. In contrast, the expression of genes encoding ABC and sugar transporters increased significantly in the late stage of leaf senescence (Fig. 8C), indicating that these genes may play important roles in nutrient recycling at this stage.

### Comparison of genes differentially expressed in natural leaf senescence between maize and *Arabidopsis*

To elucidate the molecular mechanisms underlying leaf senescence, SAGs have been identified in *Arabidopsis* during natural and induced senescence at the genome-wide level [5–8, 73, 76]. Breeze and collaborators performed a high-resolution time-course profiling of transcripts during *Arabidopsis* leaf senescence by microarray analysis [8]. To analyze the extent of the similarity of the molecular mechanisms underlying natural leaf senescence between maize and *Arabidopsis*, we performed a BLAST of the amino acid sequences of 4,552 genes differentially expressed during maize leaf senescence in the *Arabidopsis* database [54] using a criterion  $e\text{-value} < 1e-10$ . The comparison results revealed that the 4,552 genes in maize hit 3,935 genes in *Arabidopsis*. These 3,935 genes were compared with the differentially expressed genes described by Breeze et al. (2011) [8]. There were 1,107 genes occupying approximately 28.13% of the total altered expression genes in maize leaf senescence conserved in both SAG datasets (S8 Table). These conserved genes are significantly enriched for genes linked to the chloroplast, thylakoid, and membrane, with function in metabolic processes, particularly photosynthesis, transport, the carboxylic acid catabolic process, the aromatic amino acid catabolic process, lipid metabolism, protein degradation, and hormone metabolism (Table 4, S8 Table), implying that they are conserved in the leaf senescence process of both maize and *Arabidopsis*. Among these, a number of differentially expressed genes in our dataset showed high similarities to the established SAGs identified in *Arabidopsis* (Table 2). These genes and their *Arabidopsis* orthologs probably function in the regulation of leaf senescence in similar ways.

### Comparison of gene expression profile between natural and induced leaf senescence in maize

Leaf senescence is controlled by endogenous factors (e.g., age, ethylene, jasmonic acid, salicylic acid, abscisic acid, and cytokinin) and environmental signals (e.g., drought, darkness, extreme temperature, UV-B irradiation, and pathogen attack) [3]. Transcriptional profiling during senescence induced by the prevention of pollination was investigated in maize by Sekhon et al. (2012) [10]. Comparing our datasets with the ones described by Sekhon et al., it was revealed that only 998 genes overlapped between the two datasets (S9A Table). Some of the major

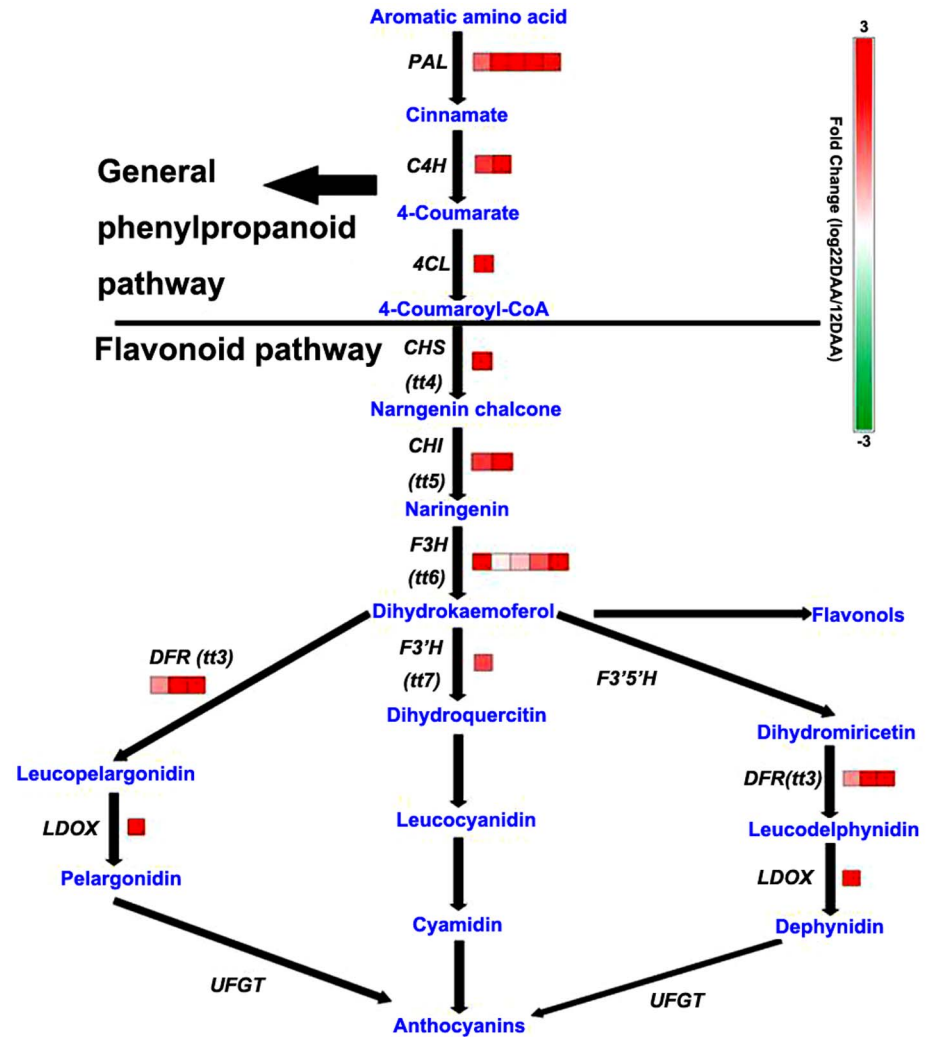

Fig. 7. Expression changes of genes involved in flavonoid biosynthesis during maize leaf senescence.

doi:10.1371/journal.pone.0115617.g007

function categories of these genes include the biological processes involved in leaf senescence, e.g. amino acid metabolism, hormone metabolism, lipid metabolism, protein degradation, photosynthesis, transcriptional regulation, and transport. Among the differentially expressed genes, 78.07% of genes during natural maize leaf senescence were not found in the induced senescing maize leaves. Genes specifically expressed in the maize natural senescence process were mainly involved in oxidation reduction, transport, protein amino acid phosphorylation, response to biotic stimulus, the aromatic amino acid family biosynthesis and catabolic process, and the cellular polysaccharide biosynthetic process (Table 5), suggesting that these biological metabolic pathways may play critical roles in the natural senescence of maize.

TFs play an important role in leaf senescence. Some TF families involved in leaf senescence, e.g. AP2/EREBP, MYB, WRKY, were found in two datasets.



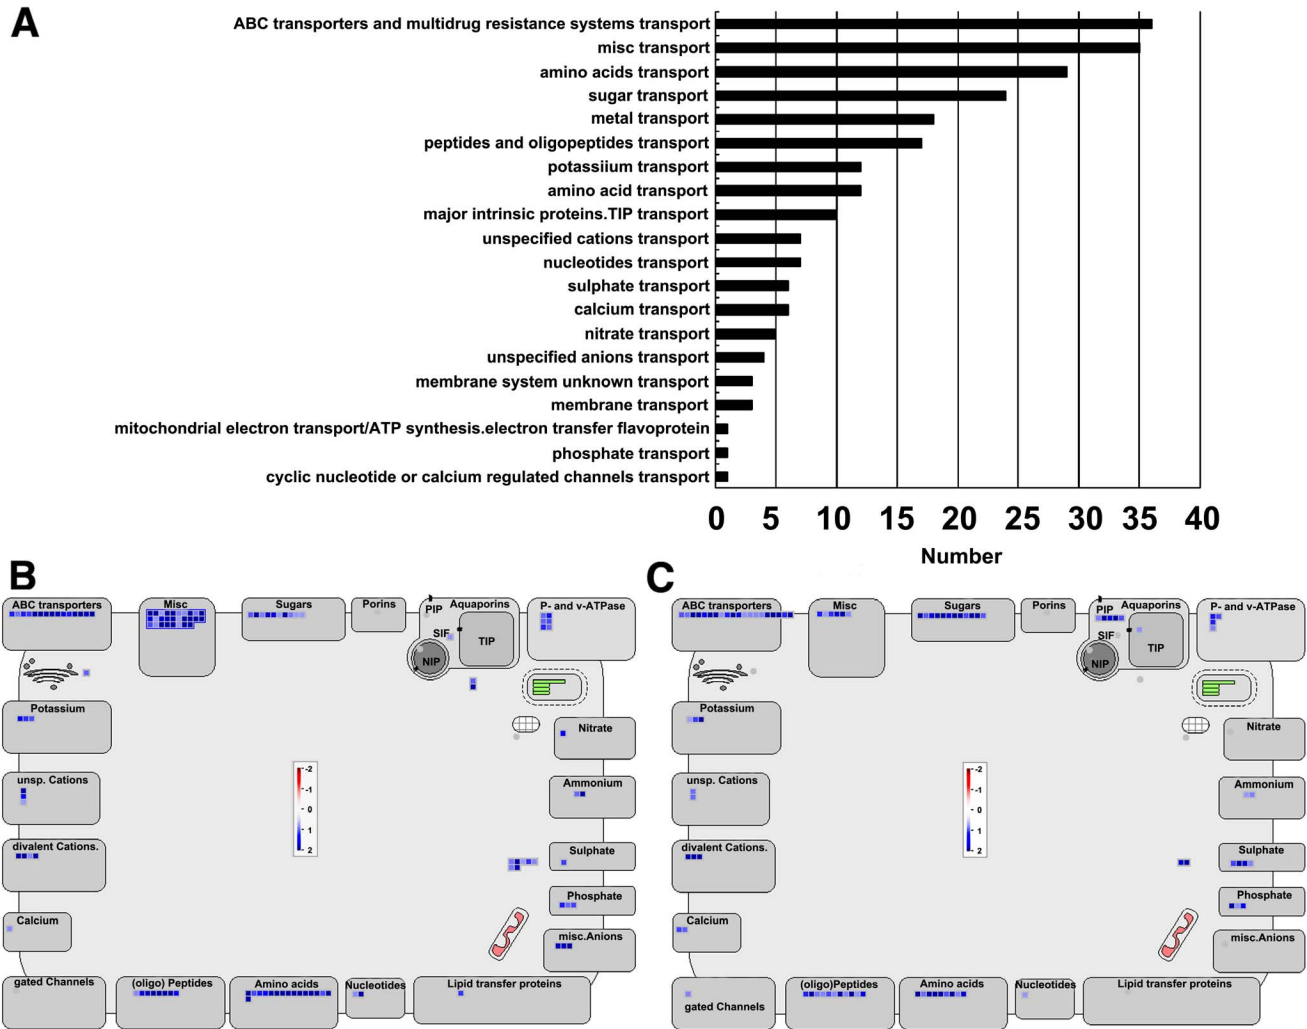

**Fig 8. Distribution of transport-related genes in SAGs in maize.** (A) Distribution of transport-related genes in maize SAGs. (B) Distribution of the up-regulation expressed genes involved in transport process in early stage of maize leaf senescence. (C) Distribution of the up-regulation expressed genes involved in transport process in advanced stage of maize leaf senescence. The number of genes in each gene family was equal to the number of boxes in each gene family. The relative expression is represented by color scales as indicated.

doi:10.1371/journal.pone.0115617.g008

Intriguingly, expression change of *ELF3* (AC233870.1\_FG003) was only detected in natural senescence. *ELF3* is involved in light deprivation induced leaf senescence and inhibits senescence by repressing PIF4/PIF5 [77]. In addition, 6 genes encoding DNA methyltransferase or histone acetyltransferase show expression level change during natural leaf senescence (S9B Table), implying epigenetic regulation may have a role during natural leaf senescence. From this analysis, it is suggested there are similarities and differences between natural senescence and induced senescence in maize.

**Table 4.** GO analysis of differentially expressed genes during natural leaf senescence in maize and Arabidopsis.

| GO Term <sup>a</sup> | Term type <sup>a</sup>                       | Query item <sup>b</sup> | Query total <sup>c</sup> | P value <sup>d</sup> | FDR <sup>e</sup> |
|----------------------|----------------------------------------------|-------------------------|--------------------------|----------------------|------------------|
| P                    | carbohydrate biosynthetic process            | 30                      | 1097                     | 4.60E-09             | 5.90E-07         |
| P                    | carbohydrate metabolic process               | 64                      | 1097                     | 8.00E-11             | 1.40E-08         |
| P                    | carboxylic acid biosynthetic process         | 34                      | 1097                     | 2.80E-07             | 2.00E-05         |
| P                    | carboxylic acid catabolic process            | 14                      | 1097                     | 3.50E-06             | 0.00019          |
| P                    | carboxylic acid metabolic process            | 61                      | 1097                     | 9.40E-10             | 1.40E-07         |
| P                    | cellular carbohydrate biosynthetic process   | 24                      | 1097                     | 3.20E-09             | 4.30E-07         |
| P                    | cellular carbohydrate metabolic process      | 49                      | 1097                     | 3.80E-15             | 1.50E-12         |
| P                    | cellular glucan metabolic process            | 15                      | 1097                     | 1.80E-07             | 1.50E-05         |
| P                    | cellular ketone metabolic process            | 62                      | 1097                     | 9.90E-10             | 1.40E-07         |
| P                    | cellular lipid metabolic process             | 39                      | 1097                     | 1.40E-05             | 0.00072          |
| P                    | cellular metabolic process                   | 359                     | 1097                     | 5.20E-13             | 1.10E-10         |
| P                    | cellular nitrogen compound metabolic process | 39                      | 1097                     | 1.50E-07             | 1.30E-05         |
| P                    | cellular polysaccharide biosynthetic process | 15                      | 1097                     | 3.50E-07             | 2.40E-05         |
| P                    | cellular polysaccharide metabolic process    | 18                      | 1097                     | 1.60E-07             | 1.30E-05         |
| P                    | cellular process                             | 454                     | 1097                     | 4.00E-13             | 9.70E-11         |
| P                    | cellulose biosynthetic process               | 6                       | 1097                     | 1.90E-05             | 0.00097          |
| P                    | establishment of localization                | 97                      | 1097                     | 5.00E-08             | 5.30E-06         |
| P                    | fatty acid metabolic process                 | 23                      | 1097                     | 7.20E-07             | 4.40E-05         |
| P                    | glucan biosynthetic process                  | 12                      | 1097                     | 2.90E-07             | 2.10E-05         |
| P                    | glucan metabolic process                     | 15                      | 1097                     | 2.40E-07             | 1.90E-05         |
| P                    | lipid catabolic process                      | 12                      | 1097                     | 1.90E-05             | 0.00097          |
| P                    | lipid metabolic process                      | 51                      | 1097                     | 2.00E-06             | 0.00012          |
| P                    | localization                                 | 99                      | 1097                     | 7.90E-08             | 7.80E-06         |
| P                    | macromolecule modification                   | 101                     | 1097                     | 6.60E-12             | 1.30E-09         |
| P                    | metabolic process                            | 447                     | 1097                     | 5.90E-19             | 5.20E-16         |
| P                    | monocarboxylic acid metabolic process        | 36                      | 1097                     | 2.00E-08             | 2.30E-06         |
| P                    | organic acid biosynthetic process            | 34                      | 1097                     | 2.80E-07             | 2.00E-05         |
| P                    | organic acid catabolic process               | 14                      | 1097                     | 3.50E-06             | 0.00019          |
| P                    | organic acid metabolic process               | 61                      | 1097                     | 9.80E-10             | 1.40E-07         |
| P                    | oxoacid metabolic process                    | 61                      | 1097                     | 9.40E-10             | 1.40E-07         |
| P                    | phosphate metabolic process                  | 98                      | 1097                     | 4.20E-19             | 5.20E-16         |
| P                    | phosphorus metabolic process                 | 98                      | 1097                     | 4.40E-19             | 5.20E-16         |
| P                    | phosphorylation                              | 88                      | 1097                     | 9.10E-17             | 4.80E-14         |
| P                    | polysaccharide biosynthetic process          | 17                      | 1097                     | 1.50E-07             | 1.30E-05         |
| P                    | polysaccharide metabolic process             | 20                      | 1097                     | 1.00E-07             | 9.20E-06         |
| P                    | post-embryonic development                   | 47                      | 1097                     | 4.40E-07             | 2.90E-05         |
| P                    | post-translational protein modification      | 92                      | 1097                     | 5.50E-15             | 1.80E-12         |
| P                    | primary metabolic process                    | 370                     | 1097                     | 1.90E-13             | 5.10E-11         |
| P                    | protein amino acid phosphorylation           | 80                      | 1097                     | 3.80E-16             | 1.70E-13         |
| P                    | protein modification process                 | 101                     | 1097                     | 1.80E-14             | 5.40E-12         |
| P                    | response to abiotic stimulus                 | 93                      | 1097                     | 1.40E-11             | 2.70E-09         |
| P                    | response to chemical stimulus                | 109                     | 1097                     | 7.90E-09             | 9.60E-07         |
| P                    | response to endogenous stimulus              | 58                      | 1097                     | 9.90E-06             | 0.00054          |
| P                    | response to external stimulus                | 34                      | 1097                     | 5.10E-07             | 3.20E-05         |

Table 4. Cont.

| GO Term <sup>a</sup> | Term type <sup>a</sup>        | Query item <sup>b</sup> | Query total <sup>c</sup> | P value <sup>d</sup> | FDR <sup>e</sup> |
|----------------------|-------------------------------|-------------------------|--------------------------|----------------------|------------------|
| P                    | response to hormone stimulus  | 55                      | 1097                     | 7.40E-06             | 0.00041          |
| P                    | response to light stimulus    | 42                      | 1097                     | 4.70E-07             | 3.00E-05         |
| P                    | response to organic substance | 71                      | 1097                     | 2.40E-06             | 0.00014          |
| P                    | response to radiation         | 43                      | 1097                     | 3.90E-07             | 2.60E-05         |
| P                    | response to stimulus          | 213                     | 1097                     | 6.40E-17             | 4.20E-14         |
| P                    | response to stress            | 115                     | 1097                     | 4.60E-08             | 5.10E-06         |
| P                    | secondary metabolic process   | 39                      | 1097                     | 6.50E-08             | 6.60E-06         |
| P                    | transport                     | 96                      | 1097                     | 8.30E-08             | 7.90E-06         |

GO terms with *P* value <0.001 and FDR ≤ 0.001 were regarded as overrepresented terms.

<sup>a</sup>GO term classifications: P, Biological Process.

<sup>b</sup>The distribution of query genes in each GO term.

<sup>c</sup>Total annotated query item number in agriGO.

<sup>d</sup>Determined by Fisher exact test.

<sup>e</sup>Determined by Benjamini-Hochberg-Yekutieli procedure.

doi:10.1371/journal.pone.0115617.t004

## Conclusions

In this study, many genes involved in protein metabolism, transcription, miscellaneous enzyme families, transporters, and signal transduction were identified as differentially expressed during natural leaf senescence in maize. Furthermore, some signalling pathways, such as the biological synthesis of aromatic amino acids, photosynthesis, and transport, were found to play important roles in the regulation of the leaf senescence process in maize. Our data reveal that there are differences in the biological and chemical changes between the early stage and the late stage of leaf senescence. Comparison analyses suggest that 1) the molecular mechanisms of leaf senescence are basically similar between maize and *Arabidopsis* and 2) there are convergence and divergence between natural and induced leaf senescence in maize. These data will extend our understanding of the mechanism of leaf senescence in maize.

## Materials and Methods

### Plant materials and RNA preparation

Plants of maize inbred line Q319 were grown under natural field conditions at Shandong Agricultural University Experimental Station (36°16' N, 117°16' E), Tai'an, China during the summer of 2011. The upper parts of the ear leaves (approx. 15–20 cm) (Fig. 1) were harvested at 12, 20, and 28 DAP and were immediately frozen in liquid nitrogen. To reduce biological variation, material was harvested at random from at least three plants and was mixed well.

Total RNA was isolated according to the modified CTAB method described by Gambino et al. (2008)[78] and was purified using an RNeasy MinElute Cleanup Kit (Qiagen, Valencia, CA, USA). The concentration of RNA was measured by Nanodrop spectrophotometry (Nanodrop Technologies, Wilmington, DE, USA),

**Table 5.** Overrepresented GO terms of differentially expressed genes only in the natural senescence.

| GO Term <sup>a</sup>                            | Term type <sup>a</sup> | Query item <sup>b</sup> | Query total <sup>c</sup> | Bg item <sup>d</sup> | Bg total <sup>e</sup> | P value <sup>f</sup> | FDR <sup>g</sup> |
|-------------------------------------------------|------------------------|-------------------------|--------------------------|----------------------|-----------------------|----------------------|------------------|
| oxidation reduction                             | P                      | 11                      | 201                      | 2006                 | 2743                  | 39203                | 1.10E-06         |
| transport                                       | P                      | 8                       | 261                      | 2006                 | 3841                  | 39203                | 1.00E-05         |
| protein amino acid phosphorylation              | P                      | 22                      | 166                      | 2006                 | 2387                  | 39203                | 0.0001           |
| response to biotic stimulus                     | P                      | 19                      | 8                        | 2006                 | 31                    | 39203                | 0.00013          |
| aromatic amino acid family biosynthetic process | P                      | 201                     | 11                       | 2006                 | 64                    | 39203                | 0.00038          |
| aromatic compound catabolic process             | P                      | 166                     | 8                        | 2006                 | 37                    | 39203                | 0.00048          |
| cellular polysaccharide biosynthetic process    | P                      | 8                       | 22                       | 2006                 | 195                   | 39203                | 0.00048          |
| fatty acid biosynthetic process                 | P                      | 261                     | 19                       | 2006                 | 159                   | 39203                | 0.00056          |
| photosystem                                     | C                      | 13                      | 13                       | 2006                 | 81                    | 39203                | 0.00024          |
| electron carrier activity                       | F                      | 23                      | 85                       | 2006                 | 914                   | 39203                | 2.10E-07         |
| heme binding                                    | F                      | 85                      | 77                       | 2006                 | 876                   | 39203                | 5.60E-06         |
| monooxygenase activity                          | F                      | 77                      | 54                       | 2006                 | 553                   | 39203                | 7.10E-06         |
| protein serine/threonine kinase activity        | F                      | 54                      | 163                      | 2006                 | 2248                  | 39203                | 1.50E-05         |
| UDP-glucosyltransferase activity                | F                      | 5                       | 16                       | 2006                 | 100                   | 39203                | 5.00E-05         |
| zinc ion transmembrane transporter activity     | F                      | 163                     | 5                        | 2006                 | 10                    | 39203                | 7.20E-05         |
| acyltransferase activity                        | F                      | 16                      | 23                       | 2006                 | 187                   | 39203                | 0.0001           |
| oxo-acid-lyase activity                         | F                      | 5                       | 5                        | 2006                 | 12                    | 39203                | 0.00021          |

GO terms with *P* value <0.001 and FDR ≤ 0.05 were regarded as overrepresented terms.

<sup>a</sup>GO term classifications: P, Biological Process; C, Cellular Component; F, Molecular Function.

<sup>b</sup>The distribution of query genes in each GO term.

<sup>c</sup>Total annotated query item number in agriGO.

<sup>d</sup>Query item number in maize genome version 5a.

<sup>e</sup>Total annotated item number in maize genome version 5a.

<sup>f</sup>Determined by Fisher exact test.

<sup>g</sup>Determined by Benjamini-Hochberg-Yekutieli procedure.

doi:10.1371/journal.pone.0115617.t005

and the RNA quality was examined using an Agilent 2100 Bioanalyzer (Agilent Technologies, Palo Alto, CA, USA). RNA from separate biological samples was used for the construction of libraries.

### Library construction and high-throughput RNA sequencing

Approximately 5 to 8 µg total RNA from each sample was used to construct RNA-Seq libraries. Firstly, the RNA was enriched with poly(A) using oligo(dT) magnetic beads (Illumina, San Diego, CA, USA). Secondly, mRNA was broken into short fragments (approx. 200 bp). Thirdly, first-strand cDNAs were synthesized, using the broken fragments as templates, with random hexamer primers. Then, components including buffer, dNTPs, RNase H, and DNA polymerase I were added to synthesize second-strand cDNA. Next, the cDNA fragments were added with sequencing adaptors. After size-selection by electrophoresis, the required fragments were enriched by PCR amplification.

Finally, the quality and quantity of all libraries were assessed by Nanodrop ND-1000 spectroscopy (Thermo Scientific, Waltham, MA) and with an Agilent 2100 Bioanalyzer. All experiments were performed according to the instructions of the RNA-Seq sample preparation kit (Illumina Inc., San Diego, USA; Cat. No. RS-100-0801).

High-throughput next generation transcriptome sequencing using an Illumina HiSeq 2000 was performed on the libraries of leaves at 12, 20, and 28 DAP at the Beijing Genomics Institute (BGI; Shenzhen, China). Original image data were transformed into sequence data via base calling and generated single-end sequence reads. The read quality was evaluated using Illumina Genome Analysis Pipeline (version 1.6) Software. Single-end 49-bp reads were collected. Three types of reads were rejected: (1) reads containing more than 10% unknown bases, (2) reads with an adaptor, and (3) reads containing more than 50% low-quality bases. The remaining reads were defined as filtered clean reads. All sequences are available at the ArrayExpress database (accession number E-MTAB-1709).

### RNA sequencing data analysis

Using the improved Short Oligonucleotide Alignment Program (SOAP2) [43], we mapped filtered clean reads to the AGPv2 maize B73 reference genome [16, 79]. Mismatches of no more than two bases were allowed in the alignment. After the alignment of clean reads, data were divided into three categories: unique matched reads, multi-position matched reads, and unmapped reads. Among these, only unique matched reads were selected for the calculation of the digital gene expression levels. The normalized gene expression levels were calculated as described by Mortazavi et al. (2008) [80] and were reported as reads per kilobase per million reads mapped (RPKM). For one gene having multiple transcripts, the longest transcript was selected to calculate the expression level and coverage.

Pearson correlation coefficients analysis of log<sub>2</sub>-transformed RPKM values among the RNA-seq libraries were performed using the R package. To reduce sequencing errors, genes with fewer than two clean reads were omitted. The log<sub>2</sub>-transformed RPKM values of genes expressed in at least one of the three samples were used for PCCs analysis. All log<sub>2</sub>-transformed RPKM values less than zero were set to zero. Only tests significant at  $p=0.05$  are shown. The heat map showing the correlation values of the three tissues was drawn by Scalable Vector Graphics.

To identify differentially expressed genes during leaf senescence, the significance of digital gene expression analysis was tested [44]. Using fold change  $\geq 2$  and FDR  $\leq 1E-10$  as the criteria, genes differentially expressed in at least one of the three comparisons (ESL vs. ML, LSL vs. ML, and LSL vs. ESL) were regarded as differentially expressed during pollination. Gene annotations were derived from AGP v2 5b.60 [42]. Differentially expressed genes were classified into various categories in accordance to MapMan annotation. GO analysis was performed using the Singular Enrichment Analysis tool [81].



Two statistical analyses were conducted to identify overlaps between our SDEG dataset and SAGs identified by Breeze et al. (2011) [8] in *Arabidopsis*. First, the protein sequences of the 3,952 differentially expressed genes were extracted and used as queries to BLAST search against the TAIR 10 *Arabidopsis* protein database [54]. Using E-values  $\leq 1e-10$  as the cut-off, the best hit *Arabidopsis* gene was considered as the homolog of each maize gene. Second, homologous genes with identical locus names to those identified by Breeze et al. (2011) [8] were selected. Furthermore, protein sequences of well-known SAGs were extracted and used to BLAST against the maize AGPv2 5b.60-filtered gene set peptide database [42] to find candidate functional genes in maize natural leaf senescence.

### RT-qPCR analysis

Total RNA was extracted using the method described above and then treated with RNase-free DNase I (Promega, Madison, WI, USA) to eliminate genomic DNA. In accordance with the manufacturer's instructions, 4 mg total RNA was used for cDNA synthesis with oligo (dT) primers and M-MLV reverse transcriptase (Promega, Madison, WI, USA). RT-qPCR was performed using SYBR Green Real-time PCR Master Mix (Toyobo, Osaka, Japan) on a CFX96 Real-Time PCR Detection System (Bio-Rad Laboratories Inc., USA). For each gene detected by RT-qPCR, three biological replicates were analyzed. 18S rRNA was used to normalize mRNA levels. Quantitative variations in different replicates were calculated using the delta-delta threshold cycle relative quantification method. The primers used for RT-qPCR are listed in [S4 Table](#).

## Supporting Information

**S1 Table. Distribution of reads sequenced from maize natural senescence leaves.** (A) Summary of reads mapped to the reference genome. (B) Summary of reads mapped to the reference gene database.

[doi:10.1371/journal.pone.0115617.s001](https://doi.org/10.1371/journal.pone.0115617.s001) (DOC)

**S2 Table. Genes expressed in maize leaves at three different stages of natural senescence.**

[doi:10.1371/journal.pone.0115617.s002](https://doi.org/10.1371/journal.pone.0115617.s002) (XLS)

**S3 Table. Genes differentially expressed in maize natural leaf senescence.** (A) Genes differentially expressed in the ESL/ML comparison. (B) Genes differentially expressed in the LSL/ML comparison. (C) Genes differentially expressed in the LSL/ESL comparison.

[doi:10.1371/journal.pone.0115617.s003](https://doi.org/10.1371/journal.pone.0115617.s003) (XLS)

**S4 Table. Primers used for RT-qPCR.**

[doi:10.1371/journal.pone.0115617.s004](https://doi.org/10.1371/journal.pone.0115617.s004) (XLS)

**S5 Table. Differentially expressed transcription factors in maize leaves during natural senescence.**

[doi:10.1371/journal.pone.0115617.s005](https://doi.org/10.1371/journal.pone.0115617.s005) (XLS)

**S6 Table. GO analysis of differentially expressed genes encoding transcriptional factors during natural maize leaf senescence.** Using FDR < 0.05 as the criterion, overrepresented GO terms (biological process) were selected using the agriGO analysis tool. <sup>a</sup>GO term classifications: P, Biological Process; C, Cellular Component; F, Molecular Function. <sup>b</sup>Query item number in MS preferential expressed genes. <sup>c</sup>Total annotated query item number in agriGO. <sup>d</sup>Query item number in maize genome version 5a. <sup>e</sup>Total annotated item number in maize genome version 5a. <sup>f</sup>Determined by Fisher exact test. <sup>g</sup>Determined by Benjamini-Hochberg-Yekutieli procedure.

[doi:10.1371/journal.pone.0115617.s006](https://doi.org/10.1371/journal.pone.0115617.s006) (XLS)

**S7 Table. Expression patterns of differentially expressed genes involved in flavonoid biosynthesis during maize leaf senescence.**

[doi:10.1371/journal.pone.0115617.s007](https://doi.org/10.1371/journal.pone.0115617.s007) (XLS)

**S8 Table. The differentially expressed genes during natural leaf senescence in maize and *Arabidopsis*.** (A) The overlap of differentially expressed genes during natural leaf senescence in both maize and *Arabidopsis*. (B) The differentially expressed genes during natural leaf senescence only in maize.

[doi:10.1371/journal.pone.0115617.s008](https://doi.org/10.1371/journal.pone.0115617.s008) (XLS)

**S9 Table. The differentially expressed genes in natural and induced senescence leaves in maize.** (A) The overlap of differentially expressed genes in natural senescence leaf and induced senescence leaf in maize. (B) The differentially expressed genes only in natural senescence leaf in maize. (C) The differentially expressed genes in induced senescence leaf in maize.

[doi:10.1371/journal.pone.0115617.s009](https://doi.org/10.1371/journal.pone.0115617.s009) (XLS)

## Author Contributions

Conceived and designed the experiments: XYZ XSZ. Performed the experiments: WYZ WLL. Analyzed the data: WYZ YCX XYZ LY XY. Contributed reagents/materials/analysis tools: WYZ WLL. Wrote the paper: XYZ XSZ.

## References

1. Wu XY, Kuai BK, Jia JZ, Jing HC (2012) Regulation of leaf senescence and crop genetic improvement. *J Integr Plant Biol* 54: 936–952.
2. Lim PO, Kim HJ, Nam HG (2007) Leaf senescence. *Annu Rev Plant Biol* 58: 115–136.
3. Zhang H, Zhou C (2013) Signal transduction in leaf senescence. *Plant Mol Biol* 82: 539–545.
4. Ansari MI, Chen S-CG (2011) Leaf Senescence-An Overview. *Int J Recent Trends Sci Tech* 1: 110–114
5. Guo Y, Cai Z, Gan SS (2004) Transcriptome of *Arabidopsis* leaf senescence. *Plant Cell Environ* 27: 521–549

6. **Buchanan-Wollaston V, Page T, Harrison E, Breeze E, Lim PO, et al.** (2005) Comparative transcriptome analysis reveals significant differences in gene expression and signaling pathways between developmental and dark/starvation-induced senescence in *Arabidopsis*. *Plant J* 42: 567–585.
7. **van der Graaff E, Schwacke R, Schneider A, Desimone M, Flugge UI, et al.** (2006) Transcription analysis of *Arabidopsis* membrane transporters and hormone pathways during developmental and induced leaf senescence. *Plant Physiol* 141: 776–792.
8. **Breeze E, Harrison E, McHattie S, Hughes L, Hickman R, et al.** (2011) High-resolution temporal profiling of transcripts during *Arabidopsis* leaf senescence reveals a distinct chronology of processes and regulation. *Plant Cell* 23: 873–894.
9. **Besseau S, Li J, Palva ET** (2012) WRKY54 and WRKY70 co-operate as negative regulators of leaf senescence in *Arabidopsis thaliana*. *J Exp Bot* 63: 2667–2679.
10. **Sekhon RS, Childs KL, Santoro N, Foster CE, Buell CR, et al.** (2012) Transcriptional and metabolic analysis of senescence induced by preventing pollination in maize. *Plant Physiol* 159: 1730–1744.
11. **Zhang K, Gan SS** (2012) An abscisic acid-AtNAP transcription factor-SAG113 protein phosphatase 2C regulatory chain for controlling dehydration in senescing *Arabidopsis* leaves. *Plant Physiol* 158: 961–969.
12. **Zhang B, Jia J, Yang M, Yan C, Han Y** (2012) Overexpression of a LAM domain containing RNA-binding protein LARP1c induces precocious leaf senescence in *Arabidopsis*. *Mol Cells* 34: 367–374.
13. **Hou K, Wu W, Gan SS** (2013) SAUR36, a small auxin up RNA gene, is involved in the promotion of leaf senescence in *Arabidopsis*. *Plant Physiol* 161: 1002–1009.
14. **Jan A, Maruyama K, Todaka D, Kidokoro S, Abo M, et al.** (2013) OsTZF1, a CCCH-tandem zinc finger protein, confers delayed senescence and stress tolerance in rice by regulating stress-related genes. *Plant Physiol* 161: 1202–1216.
15. **Kim YS, Sakuraba Y, Han SH, Yoo SC, Paek NC** (2013) Mutation of the *Arabidopsis* NAC016 transcription factor delays leaf senescence. *Plant Cell Physiol* 54: 1660–1672.
16. **Pérez-Rodríguez P, Riaño-Pachón DM, Corrêa LG, Rensing SA, Kersten B, et al.** (2010) PlnTFDB: updated content and new features of the plant transcription factor database. *Nucleic Acids Research (Database issue)*: D822–D827.
17. **Zhang H, Jin J, Tang L, Zhao Y, Gu X, et al.** (2011) PlantTFDB 2.0: update and improvement of the comprehensive plant transcription factor database. *Nucleic Acids Res* 39: D1114–D1117.
18. **Hinderhofer K, Zentgraf U** (2001) Identification of a transcription factor specifically expressed at the onset of leaf senescence. *Planta* 213: 469–473.
19. **Robatzek S, Somssich IE** (2002) Targets of AtWRKY6 regulation during plant senescence and pathogen defense. *Genes Dev* 16: 1139–1149.
20. **Miao Y, Zentgraf U** (2007) The antagonist function of *Arabidopsis* WRKY53 and ESR/ESP in leaf senescence is modulated by the jasmonic and salicylic acid equilibrium. *Plant Cell* 19: 819–830.
21. **Miao Y, Zentgraf U** (2010) A HECT E3 ubiquitin ligase negatively regulates *Arabidopsis* leaf senescence through degradation of the transcription factor WRKY53. *Plant J* 63: 179–188.
22. **Miao Y, Smykowski A, Zentgraf U** (2008) A novel upstream regulator of WRKY53 transcription during leaf senescence in *Arabidopsis thaliana*. *Plant Biol (Stuttg)* 1: 110–120.
23. **Guo Y, Gan SS** (2006) AtNAP, a NAC family transcription factor, has an important role in leaf senescence. *Plant J* 46: 601–612.
24. **Kim JH, Woo HR, Kim J, Lim PO, Lee IC, et al.** (2009) Trifurcate feed-forward regulation of age-dependent cell death involving miR164 in *Arabidopsis*. *Science* 323: 1053–1057.
25. **Balazadeh S, Siddiqui H, Allu AD, Matallana-Ramirez LP, Caldana C, et al.** (2010) A gene regulatory network controlled by the NAC transcription factor ANAC092/AtNAC2/ORE1 during salt-promoted senescence. *Plant J* 62: 250–264.
26. **Matallana-Ramirez LP, Rauf M, Farage-Barhom S, Dortay H, Xue GP, et al.** (2013) NAC transcription factor ORE1 and senescence-induced BIFUNCTIONAL NUCLEASE1 (BFN1) constitute a regulatory cascade in *Arabidopsis*. *Mol Plant* 6: 1432–1452.

27. **Balazadeh S, Kwasniewski M, Caldana C, Mehrnia M, Zanon MI, et al.** (2011) ORS1, an H<sub>2</sub>O<sub>2</sub>-responsive NAC transcription factor, controls senescence in *Arabidopsis thaliana*. *Mol Plant* 4: 346–360.
28. **Yang SD, Seo PJ, Yoon HK, Park CM** (2011) The *Arabidopsis* NAC transcription factor VNI2 integrates abscisic acid signals into leaf senescence via the COR/RD genes. *Plant Cell* 23: 2155–2168.
29. **Ellis CM, Nagpal P, Young JC, Hagen G, Guilfoyle TJ, et al.** (2005) AUXIN RESPONSE FACTOR1 and AUXIN RESPONSE FACTOR2 regulate senescence and floral organ abscission in *Arabidopsis thaliana*. *Development* 132: 4563–4574.
30. **Kim HJ, Ryu H, Hong SH, Woo HR, Lim PO, et al.** (2006) Cytokinin-mediated control of leaf longevity by AHK3 through phosphorylation of ARR2 in *Arabidopsis*. *Proc Natl Acad Sci USA* 103: 814–819.
31. **D'haeseleer K, De Keyser A, Goormachtig S, Holsters M** (2010) Transcription factor MtATB2: about nodulation, sucrose and senescence. *Plant Cell Physiol* 51: 1416–1424.
32. **Guo Y, Gan SS** (2011) AtMYB2 regulates whole plant senescence by inhibiting cytokinin-mediated branching at late stages of development in *Arabidopsis*. *Plant Physiol* 156: 1612–1619.
33. **Hörtensteiner S, Feller U** (2002) Nitrogen metabolism and remobilization during senescence. *J Exp Bot* 53: 927–937.
34. **Gregersen PL** (2011) Senescence and nutrient remobilization in crop plants. In: Hawkesford MJ, Barraclough PB, editors., *The molecular and physiological basis of nutrient use efficiency in crops*. Blackwell, New York, pp. 83–102.
35. **Liu L, Zhou Y, Zhou G, Ye R, Zhao L, et al.** (2008) Identification of early senescence-associated genes in rice flag leaves. *Plant Mol Biol* 67: 37–55.
36. **Guiboileau A, Sormani R, Meyer C, Masclaux-Daubresse C** (2008) Senescence and death of plant organs: nutrient recycling and developmental regulation. *CR Biol* 333: 382–391.
37. **Smart CM, Hosken SE, Thomas H, Greaves JA, Blair BG, et al.** (1995) The timing of maize leaf senescence and characterisation of senescence-related cDNAs. *Physiologia Plantarum* 93: 673–682.
38. **Zhang Z, Li G, Gao H, Zhang L, Yang C, et al.** (2012) Characterization of photosynthetic performance during senescence in stay-green and quick-leaf-senescence *Zea mays* L. inbred lines. *PLoS One* 7: e42936.
39. **Griffiths CM, Hosken SE, Oliver D, Chojecki J, Thomas H** (1997) Sequencing, expression pattern and RFLP mapping of a senescence-enhanced cDNA from *Zea mays* with high homology to oryzain  $\gamma$  and aleurain. *Plant Mol Biol* 34: 815–821.
40. **Lohman KN, Gan S, John MC, Amasino RM** (1994) Molecular analysis of natural leaf senescence in *Arabidopsis thaliana*. *Physiologia Plantarum* 92: 322–328.
41. **Pourtau N, Jennings R, Pelzer E, Pallas J, Wingler A** (2006) Effect of sugar-induced senescence on gene expression and implications for the regulation of senescence in *Arabidopsis*. *Planta* 224: 556–568.
42. **Maize genome sequencing project website.** Available: <http://www.maizesequence.org/index.html>. Accessed 2013 Jun 10.
43. **Li R, Yu C, Li Y, Lam TW, Yiu SM, et al.** (2009) SOAP2: an improved ultrafast tool for short read alignment. *Bioinformatics* 25: 1966–1967.
44. **Audic S, Claverie JM** (1997) The significance of digital gene expression profiles. *Genome Res* 7: 986–995.
45. **Thimm O, Bläsing O, Gibon Y, Nagel A, Meyer S, et al.** (2004) MAPMAN: a user-driven tool to display genomics data sets onto diagrams of metabolic pathways and other biological processes. *Plant J* 37: 914–939.
46. **Friso G, Giacomelli L, Ytterberg AJ, Peltier JB, Rudella A, et al.** (2004) In-depth analysis of the thylakoid membrane proteome of *Arabidopsis thaliana* chloroplasts: new proteins, new functions, and a plastid proteome database. *Plant Cell* 16: 478–499.
47. **Noh YS, Amasino RM** (1999) Identification of the promoter region responsible for the senescence-specific expression of *SAG12*. *Plant Mol Biol* 41: 181–194.
48. **Wagner R, Aigner H, Pružinská A, Jänkänpää HJ, Jansson S, et al.** (2011) Fitness analyses of *Arabidopsis thaliana* mutants depleted of FtsH metalloproteases and characterization of three FtsH6 deletion mutants exposed to high light stress, senescence and chilling. *New Phytol* 191: 449–458.

49. **Zelisko A, García-Lorenzo M, Jackowski G, Jansson S, Funk C** (2005) AtFtsH6 is involved in the degradation of the light-harvesting complex II during high-light acclimation and senescence. *Proc Natl Acad Sci USA* 102: 13699–13704.
50. **Raab S, Drechsel G, Zarepour M, Hartung W, Koshiba T, et al.** (2009) Identification of a novel E3 ubiquitin ligase that is required for suppression of premature senescence in *Arabidopsis*. *Plant J* 59: 39–51.
51. **Vogelmann K, Drechsel G, Bergler J, Subert C, Philippar K, et al.** (2012) Early senescence and cell death in *Arabidopsis* saul1 mutants involves the PAD4-dependent salicylic acid pathway. *Plant Physiol* 159: 1477–1487.
52. **Koyama T, Nii H, Mitsuda N, Ohta M, Kitajima S, et al.** (2013) A regulatory cascade involving class II ETHYLENE RESPONSE FACTOR transcriptional repressors operates in the progression of leaf senescence. *Plant Physiol* 162: 991–1005.
53. **Woo HR, Chung KM, Park JH, Oh SA, Ahn T, et al.** (2001) ORE9, an F-Box protein that regulates leaf senescence in *Arabidopsis*. *Plant Cell* 13: 1779–1790.
54. **The Arabidopsis nuclear genome website.** Available: <http://www.arabidopsis.org>. Accessed 2014 Dec 2.
55. **Balazadeh S, Riaño-Pachón DM, Mueller-Roeber B** (2008) Transcription factors regulating leaf senescence in *Arabidopsis thaliana*. *Plant Biol (Stuttg)* 1: 63–75.
56. **Smykowski A, Zimmermann P, Zentgraf U** (2010) G-Box binding factor1 reduces CATALASE2 expression and regulates the onset of leaf senescence in *Arabidopsis*. *Plant Physiol* 153: 1321–1331.
57. **Woo HR, Kim JH, Kim J, Kim J, Lee U, et al.** (2010) The RAV1 transcription factor positively regulates leaf senescence in *Arabidopsis*. *J Exp Bot* 61: 3947–3957.
58. **Cantu D, Pearce SP, Distelfeld A, Christiansen MW, Uauy C, et al.** (2011) Effect of the down-regulation of the high Grain Protein Content (GPC) genes on the wheat transcriptome during monocarpic senescence. *BMC Genomics* 12: 492.
59. **Zhou X, Jiang Y, Yu D** (2011) WRKY22 transcription factor mediates dark-induced leaf senescence in *Arabidopsis*. *Mol Cells* 31: 303–313.
60. **Wu A, Allu AD, Garapati P, Siddiqui H, Dortay H, et al.** (2012) JUNGBRUNNEN1, a reactive oxygen species-responsive NAC transcription factor, regulates longevity in *Arabidopsis*. *Plant Cell* 24: 482–506.
61. **Hickman R, Hill C, Penfold CA, Breeze E, Bowden L, et al.** (2013) A local regulatory network around three NAC transcription factors in stress responses and senescence in *Arabidopsis* leaves. *Plant J* 75: 26–39.
62. **Miao Y, Laun T, Zimmermann P, Zentgraf U** (2004) Targets of the WRKY53 transcription factor and its role during leaf senescence in *Arabidopsis*. *Plant Mol Biol* 55: 853–867.
63. **Uauy C, Distelfeld A, Fahima T, Blechl A, Dubcovsky J** (2006) A NAC Gene regulating senescence improves grain protein, zinc, and iron content in wheat. *Science* 314: 1298–1301.
64. **Du Z, Zhou X, Ling Y, Zhang Z, Su Z** (2010) agriGO: a GO analysis toolkit for the agricultural community. *Nucleic Acids Res (Web Server issue)*: W64–70.
65. **Maeda H, Duareva N** (2012) The shikimate pathway and aromatic amino acid biosynthesis in plants. *Annu Rev Plant Biol* 63: 73–105.
66. **Soudry E, Ulitzur S, Gepstein S** (2005) Accumulation and remobilization of amino acids during senescence of detached and attached leaves: *in planta* analysis of tryptophan levels by recombinant luminescent bacteria. *J Exp Bot* 56: 695–702.
67. **Eason JR, Johanston JW, de Vré L** (2000) Reversal of glyphosate inhibition of *Sandersonia aurantiaca* flower senescence with aromatic amino acids. *Postharvest Biol. Technol* 18: 81–84.
68. **Dietz KJ** (2003) Redox control, redox signaling, and redox homeostasis in plant cells. *Int Rev Cytol* 228: 141–193.
69. **Heber U, Lange OL, Shuvalov VA** (2006) Conservation and dissipation of light energy as complementary processes: homoiohydric and poikilohydric autotrophs. *J Exp Bot* 57: 1211–1223.
70. **Falcone Ferreyra ML, Rius SP, Casati P** (2012) Flavonoids: biosynthesis, biological functions, and biotechnological applications. *Front Plant Sci* 3: 222.

71. Feild TS, Lee DW, Holbrook NM (2001) Why leaves turn red in autumn. The role of anthocyanins in senescing leaves of red-osierdog-wood. *Plant Physiol* 127: 566–574.
72. Gregersen PL, Culetic A, Boschian L, Krupinska K (2013) Plant senescence and crop productivity. *Plant Mol Biol* 82: 603–622.
73. Gepstein S, Sabehi G, Carp MJ, Hajouj T, Neshher MF, et al. (2003) Large-scale identification of leaf senescence-associated genes. *Plant J* 36: 629–642.
74. Quirino BF, Reiter WD, Amasino RD (2001) One of two tandem *Arabidopsis* genes homologous to monosaccharide transporters is senescence-associated. *Plant Mol Biol* 46: 447–457.
75. Rolletschek H, Hosein F, Miranda M, Heim U, Götz KP, et al. (2005) Ectopic expression of an amino acid transporter (VfAAP1) in seeds of *Vicia narbonensis* and pea increases storage proteins. *Plant Physiol* 137: 1236–1249.
76. Lin JF, Wu SH (2004) Molecular events in senescing *Arabidopsis* leaves. *Plant J* 39: 612–628.
77. Sakuraba Y, Jeong J, Kang MY, Kim J, Paek NC, et al. (2014) Phytochrome-interacting transcription factors PIF4 and PIF5 induce leaf senescence in *Arabidopsis*. *Nat Commun* 5: 4636. doi:10.1038/ncomms5636.
78. Gambino G, Perrone I, Gribaudo I (2008) A Rapid and effective method for RNA extraction from different tissues of grapevine and other woody plants. *Phytochem Anal* 19: 520–525.
79. Schnable PS, Ware D, Fulton RS, Stein JC, Wei F, et al. (2009) The B73 maize genome: Complexity, diversity, and dynamics. *Science* 326: 1112–1115.
80. Mortazavi A, Williams BA, McCue K, Schaeffer L, Wold B (2008) Mapping and quantifying mammalian transcriptomes by RNA-Seq. *Nat Methods* 5: 621–628.
81. agriGO website. Available: <http://bioinfo.cau.edu.cn/agriGO/analysis.php>. Accessed 2014 Dec 2.
82. Yoshida S, Ito M, Nishida I, Watanabe A (2001) Isolation and RNA gel blot analysis of genes that could serve as potential molecular markers for leaf senescence in *Arabidopsis thaliana*. *Plant Cell Physiol* 42: 170–178.
83. Farage-Barhom S, Burd S, Sonogo L, Perl-Treves R, Lers A (2008) Expression analysis of the BFN1 nuclease gene promoter during senescence, abscission, and programmed cell death-related processes. *J Exp Bot* 59: 3247–3258.
84. Park JH, Oh SA, Kim YH, Woo HR, Nam HG (1998) Differential expression of senescence-associated mRNAs during leaf senescence induced by different senescence-inducing factors in *Arabidopsis*. *Plant Mol Biol* 37: 445–454.
85. Du YY, Wang PC, Chen J, Song CP (2008) Comprehensive functional analysis of the catalase gene family in *Arabidopsis thaliana*. *J Integr Plant Biol* 50: 1318–1326.
86. Lim PO, Kim Y, Breeze E, Koo JC, Woo HR, et al. (2007) Overexpression of a chromatin architecture-controlling AT-hook protein extends leaf longevity and increases the post-harvest storage life of plants. *Plant J* 52: 1140–1153.
87. Veyres N, Danon A, Aono M, Galliot S, Karibasappa YB, et al. (2008) The *Arabidopsis* sweetie mutant is affected in carbohydrate metabolism and defective in the control of growth, development and senescence. *Plant J* 55: 665–686.
88. Brusslan JA, Rus Alvarez-Canterbury AM, Nair NU, Rice JC, Hitchler MJ, et al. (2012) Genome-wide evaluation of histone methylation changes associated with leaf senescence in *Arabidopsis*. *PLoS One* 7: e33151.
89. Suzuki M, Kamide Y, Nagata N, Seki H, Ohyama K, et al. (2004) Loss of function 3-hydroxy-3-methylglutaryl coenzyme A reductase 1 (HMG1) in *Arabidopsis* leads to dwarfing, early senescence and male sterility, and reduced sterol levels. *Plant J* 37: 750–761.
90. He Y, Gan S (2001) Identical promoter elements are involved in regulation of the OPR1 gene by senescence and jasmonic acid in *Arabidopsis*. *Plant Mol Biol* 47: 595–605.
91. Vescovi M, Riefler M, Gessuti M, Novák O, Schmölling T, et al. (2012) Programmed cell death induced by high levels of cytokinin in *Arabidopsis* cultured cells is mediated by the cytokinin receptor CRE1/AHK4. *J Exp Bot* 63: 2825–2832.



92. **Zheng MS, Takahashi H, Miyazaki A, Yamaguchi K, Kusano T** (2005) Identification of the cis-acting elements in *Arabidopsis thaliana* NHL10 promoter responsible for leaf senescence, the hypersensitive response against Cucumber mosaic virus infection, and spermine treatment. *Plant Sci* 168: 415–422.
93. **Wu A, Allu AD, Garapati P, Siddiqui H, Dortay H, et al.** (2012) JUNGBRUNNEN1, a reactive oxygen species-responsive NAC transcription factor, regulates longevity in *Arabidopsis*. *Plant Cell* 24: 482–506.
94. **Masclaux-Daubresse C, Purdy S, Lemaître T, Pourtau N, Taconnat L, et al.** (2006) Genetic variation suggests interaction between cold acclimation and metabolic regulation of leaf senescence. *Plant Physiol* 143: 434–446.
95. **Zhou C, Cai Z, Guo Y, Gan S** (2009) An arabidopsis mitogen-activated protein kinase cascade, MKK9-MPK6, plays a role in leaf senescence. *Plant Physiol* 150: 167–177.
96. **Jia Y, Tao F, Li W** (2013) Lipid profiling demonstrates that suppressing *Arabidopsis* phospholipase D $\delta$  retards ABA-promoted leaf senescence by attenuating lipid degradation. *PLoS One* 8: e65687. doi: 10.1371/journal.pone.0065687.
97. **Cai S, Lashbrook CC** (2008) Stamen abscission zone transcriptome profiling reveals new candidates for abscission control: enhanced retention of floral organs in transgenic plants overexpressing *Arabidopsis* ZINC FINGER PROTEIN2. *Plant Physiol* 146: 1305–1321.
98. **Pruzinská A, Tanner G, Aubry S, Anders I, Moser S, et al.** (2005) Chlorophyll breakdown in senescent *Arabidopsis* leaves. Characterization of chlorophyll catabolites and of chlorophyll catabolic enzymes involved in the degreening reaction. *Plant Physiol* 139: 52–63.
99. **Sakuraba Y, Schelbert S, Park SY, Han SH, Lee BD, et al.** (2012) STAY-GREEN and chlorophyll catabolic enzymes interact at light-harvesting complex II for chlorophyll detoxification during leaf senescence in *Arabidopsis*. *Plant Cell* 24: 507–518.
100. **Zhang K, Halitschke R, Yin C, Liu CJ, Gan SS.** (2013) Salicylic acid 3-hydroxylase regulates *Arabidopsis* leaf longevity by mediating salicylic acid catabolism. *Proc Natl Acad Sci USA* 110: 14807–14812.
101. **McLellan H, Gilroy EM, Yun BW, Birch PR, Loake GJ** (2009) Functional redundancy in the *Arabidopsis* Cathepsin B gene family contributes to basal defence, the hypersensitive response and senescence. *New Phytol* 183: 408–418.
102. **Sakuraba Y, Kim YS, Yoo SC, Hörtensteiner S, Paek NC** (2013) 7-Hydroxymethyl chlorophyll a reductase functions in metabolic channeling of chlorophyll breakdown intermediates during leaf senescence. *Biochem Biophys Res Commun* 430: 32–37.
103. **Grassl J, Pružinská A, Hörtensteiner S, Taylor NL, Millar AH** (2012) Early events in plastid protein degradation in stay-green *Arabidopsis* reveal differential regulation beyond the retention of LHCII and chlorophyll. *J Proteome Res* 11: 5443–5452.
104. **Doyle EA, Lane AM, Sides JM, Mudgett MB, Monroe JD.** (2007) An alpha-amylase (At4g25000) in *Arabidopsis* leaves is secreted and induced by biotic and abiotic stress. *Plant Cell Environ* 30: 388–398.
105. **Kinoshita T, Yamada K, Hiraiwa N, Kondo M, Nishimura M, et al.** (1999) Vacuolar processing enzyme is up-regulated in the lytic vacuoles of vegetative tissues during senescence and under various stressed conditions. *Plant J* 19: 43–53.
106. **Veyres N, Danon A, Aono M, Galliot S, Karibasappa YB, et al.** (2008) The *Arabidopsis* sweetie mutant is affected in carbohydrate metabolism and defective in the control of growth, development and senescence. *Plant J* 55: 665–686.
107. **Schelbert S, Aubry S, Burla B, Agne B, Kessler F, et al.** (2009) Pheophytin pheophorbide hydrolase (pheophytinase) is involved in chlorophyll breakdown during leaf senescence in *Arabidopsis*. *Plant Cell* 21: 767–785.
108. **Robinson WD, Carson I, Ying S, Ellis K, Plaxton WC** (2012) Eliminating the purple acid phosphatase AtPAP26 in *Arabidopsis thaliana* delays leaf senescence and impairs phosphorus remobilization. *New Phytol* 196: 1024–1029.
109. **Robinson-Beers K, Pruitt RE, Gasser CS** (1992) Ovule development in wild-type *Arabidopsis* and two female-sterile mutants. *Plant Cell* 4: 1237–1249.

110. **Himmelblau E, Amasino RM.** (2000) Delivering copper within plant cells. *Curr Opin Plant Biol* 3: 205–210.
111. **Weaver LM, Froehlich JE, Amasino RM.** (1999) Chloroplast-targeted ERD1 protein declines but its mRNA increases during senescence in *Arabidopsis*. *Plant Physiol* 119: 1209–1216.
112. **Nakabayashi K, Ito M, Kiyosue T, Shinozaki K, Watanabe A.** (1999) Identification of *clp* genes expressed in senescing *Arabidopsis* leaves. *Plant Cell Physiol* 40: 504–514.
